# Supplementary material for: Screen time exposure and academic performance, anxiety, and behavioral problems among school children
Source: PeerJ. 2025 May 8;13:e19409. doi: 10.7717/peerj.19409 (PMC12066102; doi:10.7717/peerj.19409)
Supplement: Supplemental Information 2 [file peerj-13-19409-s002.xlsx]

## Sheet: raw data
Ageinyears	UID	Gender	BMI	InternalizingProblemPSC	ClassStandard	ScreentimeHoursDayMobileTablet	ScreenTime_Weekly	OutdoorplayingHoursDay	Playing_week	AcademicPerformanceLastorCurrentAcademicYear	SpencersChildrenAnxietyScale1	SpencersChildrenAnxietyScale2	SpencersChildrenAnxietyScale3	SpencersChildrenAnxietyScale4	SpencersChildrenAnxietyScale5	SpencersChildrenAnxietyScale6	SpencersChildrenAnxietyScale7	SpencersChildrenAnxietyScale8	SpencersChildrenAnxietyScale9	SpencersChildrenAnxietyScale10	SpencersChildrenAnxietyScale11	SpencersChildrenAnxietyScale12	SpencersChildrenAnxietyScale13	SpencersChildrenAnxietyScale14	SpencersChildrenAnxietyScale15	SpencersChildrenAnxietyScale16	SpencersChildrenAnxietyScale17	SpencersChildrenAnxietyScale18	SpencersChildrenAnxietyScale19	SpencersChildrenAnxietyScale20	SpencersChildrenAnxietyScale21	SpencersChildrenAnxietyScale22	SpencersChildrenAnxietyScale23	SpencersChildrenAnxietyScale24	SpencersChildrenAnxietyScale25	SpencersChildrenAnxietyScale26	SpencersChildrenAnxietyScale27	SpencersChildrenAnxietyScale28	SpencersChildrenAnxietyScale29	SpencersChildrenAnxietyScale30	SpencersChildrenAnxietyScale31	SpencersChildrenAnxietyScale32	SpencersChildrenAnxietyScale33	SpencersChildrenAnxietyScale34	SpencersChildrenAnxietyScale35	SpencersChildrenAnxietyScale36	SpencersChildrenAnxietyScale37	SpencersChildrenAnxietyScale38	SpencersChildrenAnxietyScale39
9	230	1	25.2895	9	4	6.70836	46.9585	3.00644	17	66.7268	3	2	1	2	2	2	3	2	2	3	1	2	2	1	2	1	2	1	2	2	2	2	2	2	2	2	2	1	2	2	1	2	2	2	2	2	2	2	2
12	14	1	19.2047	6	7	6.18715	43.31	3	14	71.4575	1	1	1	1	2	1	1	1	1	1	1	1	2	2	1	1	1	1	1	2	2	1	1	2	1	2	1	0	1	1	1	1	0	1	1	1	1	1	1
13	533	2	25.72	9	8	6.12423	42.8696	1.48537	10.43	70.8919	3	2	2	2	2	1	3	2	2	2	2	2	2	2	1	2	2	1	1	2	1	2	2	3	2	2	2	1	2	2	2	1	2	1	2	2	3	2	1
10	87	1	20.9349	5	5	6.05503	42.3852	3	5	79.3847	1	2	1	2	2	1	1	1	1	2	1	1	1	2	2	1	2	2	1	1	1	1	1	1	0	2	1	2	1	2	0	1	2	2	1	1	2	2	1
13	353	1	23.9584	7	8	5.76039	40.3227	2.47162	9	68.9654	2	2	1	2	1	1	2	2	2	1	1	1	1	1	1	2	2	3	2	1	2	2	1	2	2	2	1	2	1	1	2	2	2	1	1	1	2	1	1
9	259	1	15.9288	6	4	5.72773	40.0941	3	5	76.0526	1	1	2	2	1	1	1	1	1	1	1	1	1	0	0	0	1	0	2	1	2	1	0	0	1	0	1	1	1	1	2	1	0	0	1	1	0	1	0
8	134	2	19.9602	8	3	5.69983	39.8988	3.3	12	73.1746	1	2	2	1	1	1	2	0	1	1	2	1	2	1	1	1	1	1	1	0	1	2	1	2	1	0	1	1	1	1	1	2	0	1	1	2	1	1	1
13	241	1	23.8928	7	8	5.67712	39.7398	3	10	65.2686	2	2	1	1	1	2	2	2	1	1	1	2	1	1	1	2	2	2	3	2	2	1	2	1	1	1	1	1	3	2	2	1	3	1	1	2	2	1	2
13	256	1	19.2565	6	8	5.49743	38.482	3	7	78.2266	1	2	2	1	1	0	1	1	1	1	1	1	1	0	1	2	1	2	1	1	2	1	1	1	0	1	2	1	1	1	1	1	1	1	1	0	1	1	1
8	165	2	23.8492	8	3	5.49511	38.4658	3.3	12	60.3042	1	2	2	2	2	2	2	1	1	1	2	2	2	1	1	1	1	2	1	2	2	2	2	2	1	2	1	2	1	1	1	2	2	2	2	2	1	2	1
8	41	2	23.4269	6	3	5.44201	38.0941	3	14	61.3921	2	2	1	1	1	1	2	1	1	2	2	2	1	2	2	3	2	0	0	2	2	1	3	2	2	2	2	2	2	2	2	2	2	1	2	2	2	2	2
8	103	2	14.4907	4	3	5.39219	37.7453	3	13	74.938	1	0	0	1	1	1	1	1	1	0	1	2	1	1	0	1	1	1	1	0	1	1	0	0	1	1	0	1	1	1	0	2	1	0	0	0	1	1	1
8	350	2	18.1069	5	3	5.38994	37.7296	2.5	12	66.2321	0	1	1	0	2	1	1	1	1	1	1	1	1	1	1	0	1	1	1	1	1	1	1	1	1	1	1	1	1	1	1	2	1	0	1	1	1	1	1
9	523	2	24.0742	9	4	5.353	37.471	1.92772	13	67.2631	3	2	1	1	2	1	1	2	1	2	1	2	2	1	1	3	2	1	2	2	2	2	3	1	1	2	2	2	2	1	2	2	1	1	1	1	2	2	2
13	229	1	23.3855	8	8	5.35274	37.4692	3.01188	17	84.4114	1	2	1	2	2	1	1	1	2	2	1	1	2	2	1	1	1	1	2	1	1	1	1	2	2	2	2	2	1	1	2	2	2	2	1	2	1	2	1
12	318	2	20.5216	7	7	5.3251	37.2757	3	20	87.0058	1	1	0	2	1	2	1	1	1	2	2	1	1	1	1	3	0	3	2	1	1	1	1	2	2	2	1	1	1	1	1	2	1	1	2	1	1	2	2
9	296	2	17.2247	6	4	5.29879	37.0915	3	6	84.0519	0	1	0	0	1	1	1	0	1	2	1	2	2	1	1	1	1	1	1	2	1	1	1	1	0	1	1	1	1	2	0	1	1	0	1	1	2	1	2
9	342	1	24.7716	10	4	5.29778	37.0845	2.74055	8	74.2642	2	2	2	2	2	1	2	1	2	2	2	1	2	3	1	2	2	2	2	3	1	1	2	3	2	1	3	2	1	2	2	2	2	2	2	2	2	2	1
11	156	1	23.441	6	6	5.28238	36.9767	3.3	12	58.7798	1	1	2	1	2	2	2	2	2	2	1	1	1	1	2	2	1	2	1	1	2	1	2	1	2	1	2	2	2	2	1	2	2	1	1	2	1	1	2
9	148	2	20.8748	7	4	5.24723	36.7306	3.3	17	78.9335	1	1	2	2	1	1	2	2	2	1	2	1	1	1	2	1	1	1	1	2	1	1	2	1	2	2	2	1	1	1	1	0	1	1	1	1	1	1	1
12	525	1	27.762	10	7	5.2264	36.5848	1.90425	13	57.6477	3	2	2	2	2	3	1	2	3	1	2	2	2	2	2	2	2	2	2	2	2	2	2	2	2	2	2	1	2	2	1	1	3	2	3	2	3	3	2
12	112	1	23.8538	8	7	5.16663	36.1664	3	5	82.5903	2	2	1	2	1	2	2	2	1	1	2	1	1	2	2	2	2	1	2	1	2	1	2	2	1	2	2	1	1	1	2	2	2	2	2	2	1	2	2
11	23	2	24.83	8	6	5.13565	35.9495	3	6	66.2662	2	2	2	3	2	2	2	1	2	2	2	1	1	2	2	2	2	2	2	2	2	2	1	2	1	2	1	2	2	2	2	2	2	1	2	2	2	1	1
14	126	1	18.5688	8	9	5.13415	35.9391	3.3	18	89	1	1	2	0	0	0	1	1	1	1	2	2	2	0	1	1	1	2	2	2	1	1	1	0	1	1	1	0	1	1	2	#NULL!	2	1	1	0	0	1	1
10	215	1	21.6906	8	5	5.12672	35.887	3.16236	15	54.3246	2	1	1	1	2	1	1	2	3	2	1	1	2	1	2	2	1	1	2	1	1	2	1	2	2	2	1	2	2	2	1	2	1	1	1	2	2	2	2
11	6	2	18.8933	5	6	5.07169	35.5018	3	12	70.8168	1	1	1	0	2	1	2	2	0	2	1	1	1	2	1	1	1	2	1	2	1	1	2	2	1	1	1	1	2	0	1	2	2	1	1	1	1	2	1
11	54	1	22.259	8	6	5.06696	35.4687	3	13	77.028	1	2	1	1	1	3	2	1	2	2	2	1	2	1	1	2	2	1	2	1	2	1	1	2	1	2	1	1	1	2	2	2	1	2	1	1	2	2	1
10	339	1	20.6458	6	5	5.06677	35.4674	2.7844	11	72.633	2	1	1	2	1	1	2	2	0	1	2	1	2	2	1	1	2	2	0	2	2	1	1	2	1	1	1	1	1	2	1	1	2	1	1	2	0	1	1
14	44	1	17.8071	2	9	5.04137	35.2896	3	12	81	1	1	1	2	1	1	0	2	0	1	1	2	0	1	1	1	2	2	1	1	1	0	1	1	1	1	0	1	1	0	0	1	1	1	1	1	1	1	1
10	88	1	24.7344	11	5	5.01062	35.0743	3	15	74.4616	1	2	2	3	1	3	2	1	2	2	2	1	3	2	2	3	2	2	2	2	2	2	2	1	1	2	2	2	2	2	2	2	3	1	2	1	2	2	1
11	245	1	23.5409	7	6	4.99291	34.9504	3	6	84	2	1	1	1	1	2	2	2	2	1	2	1	2	2	2	1	1	2	1	1	2	1	2	1	1	1	1	2	2	2	2	3	2	1	1	2	1	1	2
10	223	1	23.1043	9	5	4.98627	34.9039	3.10798	9	66.435	1	1	2	2	1	2	2	1	1	2	1	2	2	1	1	1	2	1	2	1	3	2	1	1	2	2	2	1	2	2	2	2	2	2	1	2	2	2	2
10	207	2	22.0679	8	5	4.97707	34.8395	3.25515	14	62.8176	2	1	1	2	1	1	1	2	2	1	1	1	2	1	2	1	0	2	2	2	0	1	1	2	1	1	2	2	2	2	2	0	1	2	1	2	1	1	2
9	528	2	25.7141	9	4	4.97502	34.8251	1.77654	12.46	64.0789	2	1	2	1	2	2	2	2	2	2	2	2	1	2	2	2	2	2	2	2	1	2	2	3	1	2	2	2	3	2	2	1	3	2	3	3	1	2	2
12	364	2	25.1449	8	7	4.94705	34.6293	2.3	8	64.1373	2	2	1	1	2	2	2	2	2	2	1	2	2	1	2	2	1	1	1	2	1	2	1	2	2	1	2	0	2	2	2	2	1	2	2	2	3	2	2
10	142	2	17.1386	5	5	4.94347	34.6043	3.3	13	80.2537	1	2	1	1	0	1	0	1	2	1	1	1	1	2	2	1	0	2	1	1	0	1	0	0	0	1	1	2	1	1	1	1	2	0	1	0	0	1	0
11	521	2	26.2823	7	6	4.92983	34.5088	2	14	60.8492	1	2	1	1	2	2	2	2	1	1	2	2	1	1	2	2	1	2	1	2	2	2	1	2	3	2	1	2	2	2	2	2	1	2	2	3	1	1	2
13	346	2	19.4837	5	8	4.90681	34.3477	2.60832	15	72.4052	1	0	1	1	2	1	0	1	1	1	1	2	1	1	1	1	0	1	1	1	2	0	1	1	1	2	2	1	2	1	1	1	1	2	2	1	2	1	1
9	345	1	20.3925	5	4	4.8668	34.0676	2.61697	5	79.4049	1	1	1	2	1	2	2	2	1	2	1	2	1	1	2	2	1	2	1	1	1	1	1	1	1	1	1	2	0	0	0	1	2	1	1	1	0	2	2
9	354	1	19.3761	5	4	4.85923	34.0146	2.45057	8	79.2735	2	2	1	1	2	2	0	1	1	0	1	2	1	1	1	1	1	2	2	1	1	1	2	1	2	2	0	2	2	1	1	1	1	1	1	1	1	2	2
13	450	2	22.7028	7	8	4.84203	33.8942	2.3	5	88.2436	2	1	2	2	2	1	0	2	1	2	1	1	2	2	1	1	2	2	1	2	2	2	2	2	2	1	1	1	1	1	2	1	2	2	1	2	2	1	1
13	180	1	20.0973	5	8	4.78744	33.5121	3.3	14	84.6336	1	1	1	1	1	2	1	1	1	2	1	1	1	1	2	1	1	1	1	1	1	1	1	1	1	1	1	1	2	1	1	1	1	2	1	2	1	1	1
8	480	2	20.3581	7	3	4.77961	33.4572	2.3	15	86.6603	1	1	1	1	1	2	1	2	1	1	1	2	1	1	1	1	0	2	2	1	1	2	2	1	1	2	1	1	1	2	1	2	1	2	1	2	1	1	0
10	343	2	19.5123	5	5	4.77832	33.4482	2.73048	7	75.5267	1	1	1	2	1	2	1	2	1	1	2	2	0	1	1	1	0	1	1	1	1	1	2	2	2	2	1	1	1	1	1	2	2	1	2	2	1	0	1
14	213	2	22.6648	8	9	4.76901	33.3831	3.1778	17	65.3878	1	2	0	2	2	1	2	1	2	1	2	2	2	1	1	1	2	2	2	1	1	1	2	1	2	1	1	2	1	2	1	1	1	2	1	2	2	2	2
8	227	2	18.125	5	3	4.75721	33.3005	3.02365	5	59.4461	1	0	1	0	1	2	1	1	1	1	1	2	1	1	1	2	1	1	1	0	1	1	2	1	1	2	1	0	2	1	0	1	1	2	2	1	1	1	1
13	179	1	18.4356	6	8	4.74707	33.2295	3.3	15	84.359	1	1	1	1	1	1	2	0	1	0	2	1	1	1	2	1	2	1	1	1	1	1	1	1	0	1	1	2	1	1	0	1	2	1	1	2	0	1	1
9	508	1	18.0324	4	4	4.72324	33.0627	2.3	15	64.145	2	1	1	0	1	1	1	0	1	1	1	0	1	1	1	1	1	0	1	1	0	0	1	1	0	1	1	1	0	1	2	1	1	0	1	2	1	1	1
8	130	2	23.5228	8	3	4.72259	33.0582	3.3	15	64.2526	2	1	2	1	2	2	2	2	1	2	2	0	1	2	2	2	2	2	2	1	2	2	1	2	1	2	1	2	1	2	1	1	2	2	1	2	2	1	1
12	535	1	19.7997	6	7	4.71478	33.0035	1.3	9.1	50	1	1	2	2	1	1	1	1	1	1	1	1	1	1	1	1	2	1	0	2	1	2	1	0	0	2	2	2	1	1	1	1	1	1	1	0	1	1	0
14	84	2	16.3808	3	9	4.69304	32.8513	3	8	82.1896	1	1	0	1	2	1	1	1	1	1	0	0	1	2	1	1	0	1	1	1	1	1	2	1	1	1	0	1	0	0	2	1	0	1	0	1	1	2	1
9	300	2	18.6285	8	4	4.69301	32.851	3	5	70.3254	0	0	1	0	1	2	0	0	1	0	1	2	1	1	1	0	1	1	2	1	1	2	2	1	0	1	2	0	1	1	1	2	2	1	1	1	1	1	2
11	69	2	18.4992	7	6	4.6808	32.7656	3	11	88.5953	1	1	1	1	2	2	2	1	2	1	1	2	1	1	1	0	1	1	1	1	1	2	1	1	1	1	2	1	1	1	0	1	1	2	1	1	1	1	1
9	526	2	24.1574	8	4	4.67613	32.7329	1.89316	13	62.4773	0	2	1	1	2	2	1	2	1	2	2	2	2	1	2	2	1	1	2	2	2	1	1	1	2	2	1	2	1	2	1	1	2	1	2	2	2	1	2
12	358	1	19.5942	6	7	4.6757	32.7299	2.33718	5	65.3468	1	1	2	1	2	1	2	2	3	2	1	2	2	1	1	2	1	1	1	1	1	1	2	1	1	1	1	1	2	1	1	2	1	2	1	1	1	1	1
14	65	1	16.1921	6	9	4.66677	32.6674	3	14	73.229	1	2	0	0	1	1	0	1	2	0	1	1	1	2	1	2	1	1	2	1	1	1	0	0	1	0	1	0	0	0	1	0	1	0	0	0	1	2	1
11	173	2	15.544	4	6	4.66468	32.6528	3.3	5	86.5693	1	2	0	0	0	1	0	1	1	1	0	0	1	1	0	1	0	1	1	0	1	1	1	1	1	1	1	1	1	1	1	1	0	1	2	1	1	0	0
12	476	1	16.0347	5	6	4.65611	32.5928	2.3	15	99	0	1	2	1	0	2	1	2	1	1	0	1	1	0	0	0	1	1	1	1	0	1	0	1	0	1	2	1	1	0	0	1	1	1	1	1	0	1	1
13	114	1	21.9055	5	8	4.65594	32.5916	3	20	75.2285	2	1	1	2	2	0	2	2	1	1	1	1	1	1	1	2	1	2	1	1	1	1	1	1	2	1	1	2	1	1	1	1	1	2	0	2	2	2	1
11	529	2	21.1819	6	6	4.65527	32.5869	1.75214	12.25	72.2693	2	1	2	1	2	1	1	1	2	2	1	2	1	1	1	1	2	1	1	1	1	1	1	1	1	1	2	1	2	1	2	0	1	2	2	1	1	2	1
11	407	2	21.4489	6	6	4.627	32.389	2.3	8	82.714	2	1	2	2	2	1	2	2	2	1	1	1	2	2	2	2	2	1	1	1	1	1	1	1	1	1	1	1	1	2	2	1	2	2	2	2	1	1	2
14	163	2	23.7346	8	9	4.61064	32.2745	3.3	14	65.4825	2	2	2	2	2	2	2	2	2	2	3	2	1	2	1	1	1	1	1	2	2	2	2	1	1	2	1	1	2	2	1	2	2	2	1	2	2	2	1
14	401	2	22.8623	6	9	4.60375	32.2263	2.3	13	71.3023	2	1	2	2	0	1	1	1	2	1	1	2	1	2	2	3	1	1	2	3	1	1	2	1	1	2	1	1	1	1	2	1	2	2	2	2	2	2	2
8	178	1	19.0218	6	3	4.58727	32.1109	3.3	15	84	1	1	2	2	2	1	1	1	1	1	1	2	1	0	1	0	1	1	1	0	1	2	1	2	0	1	1	1	1	1	1	1	2	2	2	1	1	0	1
14	285	2	21.4087	6	9	4.584	32.088	3	10	74.6755	1	2	1	1	1	2	1	1	1	1	1	1	1	1	1	2	2	2	1	1	0	2	2	1	1	1	1	2	2	1	2	1	1	1	1	1	2	1	1
11	67	2	21.1821	7	6	4.58183	32.0728	3	12	64.3246	1	2	1	1	1	1	1	2	1	1	1	1	1	2	1	1	1	1	2	1	1	2	1	1	2	2	1	0	1	1	2	2	1	2	1	1	1	1	1
8	516	2	23.0349	9	3	4.57484	32.0239	2.3	15	63.2259	2	2	2	1	2	3	2	2	2	2	2	2	2	2	2	1	2	1	2	2	1	1	2	2	2	1	2	0	2	2	2	2	1	2	1	1	1	2	1
8	366	2	17.4083	4	3	4.56732	31.9712	2.3	4	90	0	2	1	1	1	1	1	1	1	1	1	1	1	1	1	1	1	1	0	1	1	1	1	1	1	1	1	2	1	1	2	0	2	1	1	1	1	2	1
10	444	2	19.3389	6	5	4.56518	31.9563	2.3	11	80	1	1	2	1	1	2	1	1	1	3	1	2	1	1	2	2	1	1	1	1	1	2	1	2	1	1	1	1	2	1	1	2	1	1	1	1	1	1	1
8	438	2	22.0293	7	3	4.56332	31.9432	2.3	5	80.1887	2	1	1	2	2	1	2	2	2	1	1	2	2	1	1	1	1	1	1	1	1	1	1	1	2	1	2	2	2	1	1	1	2	1	1	2	1	1	1
10	210	2	21.755	5	5	4.56053	31.9237	3.19451	12	77.7185	2	1	2	1	1	1	1	1	2	1	1	2	1	2	1	1	1	1	1	1	1	1	1	1	2	1	1	1	1	1	3	1	1	3	2	2	1	1	1
10	340	2	22.1915	5	5	4.53604	31.7523	2.777	10	82.122	2	1	1	1	1	1	2	1	2	2	2	1	1	2	2	1	2	2	1	2	2	0	1	1	2	1	1	1	1	2	1	2	2	2	2	2	2	2	1
10	58	1	17.6536	7	5	4.53195	31.7237	3	10	84.4321	0	1	1	1	1	1	1	0	1	1	1	2	1	2	1	1	1	1	2	1	1	1	1	1	0	2	2	2	2	0	1	1	2	0	0	0	1	1	0
13	122	2	23.0488	7	8	4.53188	31.7231	3	12	74.6917	2	2	2	2	2	1	2	1	1	2	1	2	2	1	2	1	2	2	1	1	1	2	1	1	2	2	1	1	2	1	1	1	2	1	1	1	1	2	1
13	191	1	18.7125	6	8	4.52077	31.6454	3.3	13	85	1	1	1	2	1	1	2	1	0	0	1	1	2	1	1	2	1	0	0	2	0	1	3	1	1	0	2	2	1	1	1	1	1	2	1	1	1	1	1
11	237	1	17.416	3	6	4.502	31.514	3	13	85	1	1	1	1	1	1	1	2	0	1	1	1	1	1	0	1	1	0	1	1	0	0	1	1	1	1	0	1	1	1	1	0	1	0	1	1	1	1	1
11	216	1	23.998	10	6	4.50199	31.5139	3.15715	15	83.7592	1	2	1	1	1	2	2	1	1	3	2	1	2	2	1	2	1	2	3	2	1	2	1	2	2	2	1	1	1	2	2	1	1	2	2	2	2	3	2
12	435	2	19.4155	4	7	4.48154	31.3708	2.3	8	73.9893	1	1	1	1	1	1	1	1	2	1	0	1	1	1	1	2	2	1	1	1	1	2	1	1	1	1	0	1	1	1	2	2	1	1	1	1	1	2	2
14	158	2	19.9139	6	9	4.47756	31.3429	3.3	17	75.9802	2	1	2	2	1	1	1	1	1	1	2	1	1	1	1	1	2	1	1	1	1	1	1	1	1	1	1	0	1	2	2	1	1	0	3	2	2	1	0
11	17	2	16.8049	4	6	4.47673	31.3371	3	12	86.5341	1	1	2	1	0	0	0	1	0	0	0	0	1	1	1	0	1	2	1	1	1	1	1	1	1	1	1	1	1	1	1	0	1	0	1	1	1	1	0
8	36	1	17.2579	3	3	4.47596	31.3317	3	16	66.4825	2	1	0	1	1	1	1	2	1	1	0	0	0	0	1	1	0	1	1	1	1	1	2	1	0	1	1	1	1	1	1	1	1	1	2	1	0	2	1
8	349	1	23.8839	10	3	4.47324	31.3127	2.51068	12	92.6023	1	1	1	1	1	1	2	2	2	1	2	2	2	1	1	2	1	1	2	1	1	2	1	1	1	2	2	2	1	2	1	1	1	1	1	2	2	1	2
8	303	2	20.3408	6	3	4.44506	31.1154	3	8	84.8299	1	1	1	1	2	1	0	2	1	1	1	2	1	0	2	1	2	2	1	1	1	1	1	1	2	1	2	1	1	1	0	1	2	2	1	1	1	1	0
14	80	1	23.3422	5	9	4.44369	31.1058	3	12	67.0171	3	2	2	1	1	2	2	2	2	2	0	1	1	2	2	1	1	1	1	2	2	2	1	2	2	2	1	1	1	3	1	2	0	2	1	0	2	2	2
11	124	1	21.1632	6	6	4.43783	31.0648	3	10	80.3639	1	1	1	0	1	1	2	2	0	1	2	2	0	2	1	2	1	2	1	1	1	2	1	1	1	1	1	2	1	1	1	2	2	1	1	2	1	1	2
10	73	2	20.2885	7	5	4.42801	30.9961	3	7	80.2334	1	1	2	1	1	1	0	1	2	0	1	1	1	1	1	1	1	1	1	1	1	2	1	2	1	1	2	1	2	1	1	1	1	1	1	1	1	1	1
12	284	2	18.6869	6	7	4.42192	30.9534	3	5	86.9571	1	0	1	1	1	2	2	1	1	1	1	1	2	1	0	1	1	1	1	1	1	1	1	1	1	1	1	0	1	1	2	1	1	1	1	2	1	1	2
11	511	1	19.9427	4	6	4.41901	30.9331	2.3	15	86	1	2	2	1	1	1	1	2	1	2	0	1	1	1	1	2	1	0	1	2	0	1	2	1	2	0	1	2	1	2	1	1	2	1	1	1	1	1	1
8	128	2	20.2858	7	3	4.40533	30.8373	3.3	16	67.9687	2	1	1	2	3	1	1	1	1	1	2	1	1	1	1	2	2	1	2	1	1	1	1	1	1	2	1	2	1	1	1	1	2	1	2	1	1	2	2
8	494	2	20.5205	6	3	4.3669	30.5683	2.3	15	74.6948	1	2	1	1	1	2	1	1	1	1	1	1	2	1	1	1	2	0	1	1	0	1	1	2	1	2	1	2	1	2	1	2	2	0	1	2	2	1	2
8	33	1	14.9621	5	3	4.34346	30.4042	3	12	84.1981	2	1	1	0	0	1	0	2	1	1	1	1	1	0	1	1	0	1	1	1	0	1	1	0	0	0	1	1	1	2	0	1	0	1	1	1	0	1	1
11	442	2	21.4331	7	6	4.32325	30.2628	2.3	12	83.9026	1	1	1	1	1	2	1	2	2	1	2	2	1	1	1	1	1	1	2	1	2	1	1	1	1	1	1	2	2	1	1	2	1	1	0	1	1	2	2
10	436	1	15.5556	4	5	4.32282	30.2598	2.3	7	88.4163	1	1	1	0	1	0	0	1	1	0	0	1	1	0	1	1	0	1	1	0	1	1	1	1	1	1	1	0	1	1	2	1	0	0	0	1	1	1	1
9	437	1	17.5664	6	4	4.31783	30.2248	2.3	6	86.366	0	1	0	0	2	1	0	1	1	1	1	1	0	1	1	1	1	1	1	1	1	2	1	1	1	1	2	1	1	1	1	1	1	1	1	0	1	1	0
13	514	1	18.6138	5	8	4.29435	30.0604	2.3	15	61.8008	1	1	1	2	1	1	1	1	1	1	0	2	1	2	0	1	1	1	2	1	1	1	1	1	1	1	1	1	1	2	2	2	1	0	1	1	1	1	2
13	68	2	19.7583	5	8	4.29151	30.0406	3	12	75.1409	2	1	2	2	2	1	1	1	1	1	1	1	1	2	2	2	1	1	1	1	1	1	1	2	0	1	1	2	2	0	1	1	0	1	1	1	1	1	1
14	457	2	20.8545	7	9	4.26361	29.8453	2.3	10	81.5549	1	2	1	2	2	2	1	1	2	1	1	2	1	1	1	2	2	2	2	1	0	2	2	2	1	1	1	1	1	0	1	0	1	1	1	1	1	1	2
14	13	1	18.6201	5	9	4.25527	29.7869	3	15	83.4614	1	1	1	1	1	1	1	2	1	2	1	1	1	1	1	0	1	1	1	1	0	1	1	1	2	2	1	1	0	1	0	0	1	1	2	1	0	1	1
13	192	1	18.5586	7	8	4.23741	29.6618	3.3	12	82.8893	2	1	0	0	1	1	0	1	1	2	1	1	2	1	1	1	0	1	2	2	0	1	1	1	1	0	1	0	1	1	0	0	2	1	1	1	1	2	0
12	505	2	21.4	6	7	4.22467	29.5727	2.3	15	71.3899	1	1	1	1	1	2	2	1	2	1	2	2	1	1	1	2	2	0	1	1	1	1	1	2	2	1	1	1	1	2	1	1	1	2	1	1	2	1	0
14	239	1	16.4903	4	9	4.22174	29.5522	3	12	81.9587	1	0	1	1	1	1	1	2	1	1	0	0	1	1	0	0	1	0	2	2	0	1	1	0	0	1	0	1	1	0	1	1	0	0	1	0	0	1	1
12	417	1	20.1349	7	7	4.21629	29.514	2.3	8	85	2	1	1	0	0	0	1	1	1	1	1	0	1	2	1	2	0	1	1	1	1	2	2	2	1	1	2	2	1	1	1	2	1	1	1	1	1	1	1
8	262	1	16.2651	4	3	4.21169	29.4818	3	8	83.6863	1	0	1	1	0	1	2	1	0	2	1	1	1	1	1	1	1	0	1	1	0	0	1	2	1	1	1	0	1	2	0	0	0	1	1	1	1	1	0
10	154	1	22.0491	7	5	4.20465	29.4325	3.3	13	82	1	1	1	2	2	0	1	1	1	2	1	2	2	1	2	2	1	0	1	2	1	2	2	2	2	2	1	1	1	2	1	0	2	1	2	2	2	2	2
9	70	2	21.6666	7	4	4.19086	29.3361	3	10	65.7022	1	1	1	2	1	2	1	1	2	1	1	2	2	2	1	1	1	1	1	1	2	2	1	1	2	3	1	1	1	0	2	2	1	1	1	1	1	2	1
10	332	2	17.1871	5	5	4.18528	29.2969	2.94215	6	74.1895	1	1	1	1	0	1	0	1	1	0	1	1	1	1	2	2	0	2	1	2	1	1	1	1	2	1	1	1	0	2	0	1	1	1	1	2	1	1	2
13	338	1	18.5344	4	8	4.18196	29.2737	2.79282	12	73.402	1	1	2	1	1	1	1	0	1	1	1	1	0	1	2	2	0	2	1	2	1	2	1	2	2	1	0	2	1	1	2	0	1	1	1	1	2	1	0
14	168	2	21.4995	6	9	4.1769	29.2383	3.3	10	82.142	0	1	2	1	1	2	2	2	1	2	2	1	0	1	2	2	1	2	1	2	1	2	1	1	1	2	1	1	1	1	1	1	2	1	2	1	1	2	0
13	146	2	19.1761	5	8	4.16332	29.1433	3.3	10	78.7228	1	1	1	0	2	1	1	1	2	0	1	1	2	1	1	3	1	1	1	1	1	0	2	1	1	1	1	1	1	2	1	1	1	1	2	1	1	1	1
14	132	2	25.6178	6	9	4.15335	29.0734	3.3	13	77.7706	2	1	1	2	2	2	2	2	1	1	1	2	2	1	2	2	2	2	0	2	2	1	1	2	2	2	2	2	2	2	2	1	2	3	2	1	3	1	2
13	351	1	20.9913	6	8	4.15079	29.0556	2.5	11	64.7232	1	2	2	1	2	1	1	2	1	1	1	2	1	1	2	1	1	1	2	2	2	1	2	1	1	1	1	2	1	1	1	2	2	1	1	2	2	2	1
10	411	1	19.9467	6	5	4.14124	28.9887	2.3	5	88.4996	1	1	1	1	1	1	2	1	2	1	2	1	1	0	0	0	1	1	1	1	1	2	1	1	1	2	0	1	2	2	1	1	2	1	1	2	1	2	2
12	357	1	17.9587	6	7	4.12834	28.8984	2.34935	5	68.8135	1	1	0	0	0	1	1	1	1	2	1	1	0	1	1	1	1	1	1	1	0	2	2	1	1	1	2	1	1	1	1	1	1	1	0	1	1	1	0
10	464	1	19.5596	7	5	4.12512	28.8758	2.3	6	86.1352	1	1	1	0	1	1	1	1	1	1	2	1	1	2	1	1	2	0	1	1	1	1	1	1	1	1	2	1	1	1	2	1	1	2	1	2	2	1	1
8	26	2	18.638	5	3	4.10719	28.7503	3	17	76.3413	1	1	1	2	1	2	1	1	2	1	1	1	1	0	2	1	1	0	1	1	1	1	1	0	1	1	1	2	1	1	1	1	1	1	2	1	2	1	0
8	232	1	19.0274	4	3	4.08258	28.578	3.00479	7	84.9395	1	1	1	1	1	1	1	1	1	1	0	1	1	1	1	1	1	2	1	1	0	1	1	2	1	1	1	2	1	1	1	1	1	1	1	0	2	1	2
8	314	1	17.8643	5	3	4.07451	28.5215	3	4	85.3742	1	1	1	1	1	0	1	2	1	1	1	1	1	1	1	1	2	1	1	2	0	1	1	2	1	1	1	0	1	0	1	1	0	1	1	1	0	1	1
14	1	2	18.6818	8	9	4.05929	28.415	3	16	82	1	0	1	1	2	2	2	1	1	1	2	1	1	2	1	1	1	1	2	2	1	2	1	2	1	1	1	1	2	1	1	1	1	1	1	1	0	1	2
8	502	1	22.8354	7	3	4.05866	28.4106	2.3	15	82.2097	1	3	1	2	2	2	1	2	1	1	2	1	1	1	2	2	1	1	1	1	2	2	1	1	1	2	1	2	2	2	1	1	1	1	2	1	2	1	0
11	30	1	19.3822	6	6	4.01853	28.1297	3	15	71.0303	2	1	2	1	1	1	1	0	2	3	2	1	1	1	1	2	1	2	0	1	1	1	1	1	1	2	2	1	0	1	1	1	1	2	2	1	2	1	1
10	405	2	14.6427	2	5	4.01822	28.1276	2.3	10	86.1546	1	1	1	0	0	1	1	0	1	1	1	1	0	1	1	0	1	0	0	0	1	0	0	0	1	1	1	1	1	1	1	1	0	0	1	0	1	1	0
9	396	2	15.514	3	4	4.01247	28.0873	2.3	7	83.5231	0	1	1	1	0	1	2	0	1	0	1	1	0	1	1	1	0	1	2	0	1	0	0	0	1	1	0	1	1	0	1	1	2	1	1	1	1	1	1
9	247	1	19.4919	6	4	4.00559	28.0391	3	15	74.8801	1	1	2	1	2	1	0	1	1	1	1	2	1	1	1	1	0	1	1	1	1	1	1	2	1	2	2	1	1	1	1	1	1	1	1	1	1	1	2
13	446	2	21.1359	8	8	3.99915	27.994	2.3	9	85.402	1	1	2	2	1	0	1	1	1	1	2	2	2	1	1	1	2	1	1	2	1	1	1	2	1	1	2	1	1	2	1	1	1	1	1	1	2	1	1
11	504	1	16.6696	6	6	3.99573	27.9701	2.3	15	85	0	1	0	1	2	0	1	0	2	0	1	0	2	1	1	1	1	1	1	1	1	1	1	0	1	1	1	0	1	1	1	1	1	1	1	1	1	1	1
11	129	2	22.7705	7	6	3.99297	27.9508	3.3	15	85.0986	2	1	1	2	1	1	2	2	1	2	2	0	1	2	1	2	2	2	1	2	1	1	1	2	2	2	2	1	1	1	1	2	2	1	1	1	1	1	1
11	277	1	21.4292	9	6	3.98389	27.8872	3	7	67.2259	1	2	2	2	1	2	2	1	1	1	1	1	2	1	2	1	1	1	2	2	1	2	1	1	2	2	2	1	1	1	2	2	1	1	1	1	1	2	1
12	391	2	18.9093	4	7	3.97807	27.8465	2.3	12	74.894	1	3	1	1	0	1	1	1	1	1	1	1	2	1	2	1	2	2	0	0	1	0	1	1	1	1	1	2	2	2	1	0	1	2	2	2	1	2	2
13	182	1	16.3649	3	8	3.97116	27.7981	3.3	12	86.6428	1	2	1	1	1	0	1	1	1	1	1	1	0	0	0	2	2	1	0	1	1	1	1	1	1	2	1	1	2	1	0	1	1	1	1	1	1	1	0
9	97	2	22.4383	7	4	3.96428	27.7499	4	19	83.8815	2	2	3	1	2	2	2	2	2	1	1	1	1	1	1	1	2	1	2	1	0	2	1	1	1	2	1	1	2	2	1	0	1	1	2	1	2	2	1
13	118	1	10	1	8	3.96406	27.7484	3	15	81	0	0	0	0	0	0	0	1	0	0	0	0	0	0	0	0	0	0	0	0	0	1	1	1	1	0	0	1	0	0	1	1	0	0	0	1	0	0	0
12	123	2	20.7177	7	7	3.93393	27.5375	3	11	86.7258	1	1	1	1	1	1	1	1	1	1	1	2	1	1	1	1	0	1	2	1	2	2	1	2	1	1	1	0	1	2	2	1	1	2	2	1	2	1	2
13	82	1	20.039	5	8	3.92644	27.485	3	10	71.1821	2	1	1	1	2	2	0	1	1	2	2	0	1	1	1	2	1	1	1	1	1	0	1	1	1	2	1	2	1	2	1	0	2	2	1	2	1	1	2
11	19	1	22.2974	7	6	3.92335	27.4634	3	10	66.2004	2	1	2	2	1	1	2	1	1	1	1	1	0	2	1	2	2	0	2	1	2	2	1	1	2	1	2	1	1	1	3	2	1	2	0	0	2	2	2
12	18	1	18.7506	4	7	3.922	27.454	3	11	87.9265	1	0	1	0	1	1	1	2	1	2	1	1	1	2	1	1	2	1	0	1	1	1	1	1	0	0	1	1	0	1	1	2	2	2	1	1	2	0	1
12	231	1	18.5467	5	7	3.91182	27.3827	3.00484	8	70.3286	1	1	2	1	1	1	1	1	2	2	1	1	1	2	2	1	1	0	1	1	0	1	1	0	1	2	1	1	2	2	1	1	1	1	2	2	1	1	1
14	104	1	23.991	8	9	3.8987	27.2909	3	12	68.7919	2	1	1	2	2	1	1	1	2	2	2	2	1	2	2	2	1	2	2	2	1	2	1	1	2	1	1	0	2	2	1	2	0	2	1	2	2	2	1
11	319	2	22.7491	5	6	3.89819	27.2873	3	18	86.2037	1	2	2	2	2	1	1	1	1	2	1	2	1	1	2	2	2	1	1	1	1	1	2	1	2	2	1	1	1	1	2	2	2	2	2	1	2	1	1
10	473	2	18.6928	5	5	3.89127	27.2389	2.3	10	62.6561	2	2	2	2	0	0	1	1	2	1	0	1	1	1	1	1	1	1	2	2	2	1	1	2	2	1	1	1	2	1	1	1	0	1	1	1	0	1	2
12	469	2	18.9995	5	7	3.88977	27.2284	2.3	8	83.6165	1	0	2	1	2	2	2	2	1	2	1	1	1	1	1	0	1	1	0	1	2	2	1	2	2	0	1	1	2	1	2	1	0	1	2	2	2	0	2
9	395	2	18.7149	7	4	3.88273	27.1791	2.3	8	79	1	2	1	2	1	1	1	0	1	2	1	1	1	2	1	2	2	2	2	1	1	1	1	2	1	1	2	0	1	2	2	2	1	2	1	1	1	1	1
12	206	1	23.8006	9	7	3.88063	27.1644	3.27913	15	83	1	2	2	2	2	2	2	2	1	2	2	1	2	1	2	0	1	3	2	2	1	2	2	2	2	2	1	1	1	1	2	1	2	2	1	2	2	1	1
14	62	1	18.4716	8	9	3.8623	27.0361	3	6	66.1679	1	2	1	1	1	2	1	1	1	2	2	1	2	1	1	1	1	1	1	2	1	2	1	1	2	1	1	1	1	2	2	1	2	1	1	1	1	2	3
10	471	1	22.1904	6	5	3.86138	27.0297	2.3	4	77.1953	1	2	1	1	3	3	2	2	1	1	1	1	2	0	2	2	1	2	1	1	1	1	2	1	2	2	1	1	1	1	2	2	2	2	1	1	1	1	2
12	531	1	19.1007	5	7	3.85904	27.0133	1.53139	10.71	80.527	0	2	1	1	1	1	1	1	1	1	1	1	1	1	1	1	2	1	1	1	2	0	1	1	1	0	2	1	2	1	2	1	1	1	1	1	1	1	1
13	524	2	21.6442	7	8	3.84942	26.946	1.92266	13	65.0042	1	1	1	1	1	1	2	2	1	2	1	1	1	2	1	1	1	2	1	2	0	2	2	1	1	2	2	1	2	2	2	1	1	2	0	2	1	1	1
9	116	1	14.8535	2	4	3.84685	26.9279	3	16	94	0	1	1	0	0	0	1	1	1	0	0	0	0	1	1	1	1	1	0	0	1	1	0	1	0	1	1	0	0	1	0	1	0	0	0	0	0	0	1
14	537	1	25.1696	9	9	3.84395	26.9076	1.2	8.4	69.9931	2	2	2	2	2	1	1	1	2	2	3	2	2	2	1	1	1	1	2	2	1	1	1	2	1	3	1	2	2	1	2	2	2	1	2	2	1	2	2
9	164	2	21.5504	8	4	3.81876	26.7313	3.3	13	81	2	1	2	1	1	1	1	2	1	1	1	2	2	2	1	1	1	2	2	2	1	1	1	2	2	2	2	0	0	1	1	2	1	1	2	1	1	1	1
11	235	1	20.4701	8	6	3.81044	26.6731	3	15	78.3087	2	3	1	1	2	1	1	1	1	1	2	0	2	1	1	2	1	1	1	2	1	1	2	2	2	2	2	1	2	2	2	0	1	1	2	2	2	1	1
14	240	1	16.1243	3	9	3.7971	26.5797	3	11	83.5264	1	0	1	1	1	2	0	2	1	2	1	2	1	1	2	1	1	1	0	1	1	1	1	0	1	1	0	2	1	2	1	1	0	1	1	1	0	0	2
10	361	1	27.5233	10	5	3.79304	26.5513	2.30934	8	87.5129	2	2	3	2	3	2	2	2	3	2	2	2	1	2	1	2	2	1	2	2	1	2	2	2	2	2	3	2	2	3	3	2	2	2	2	3	2	2	2
13	422	2	20.9102	6	8	3.77863	26.4504	2.3	21	60.2123	1	1	1	1	0	1	1	1	1	2	1	1	1	1	1	2	1	1	2	2	2	1	3	1	0	1	1	0	1	1	1	1	1	1	2	2	1	2	2
13	518	1	21.0471	6	8	3.77854	26.4498	2.21568	15	72.0196	1	1	1	2	1	1	2	2	1	1	2	1	1	1	1	2	1	2	1	2	1	1	1	2	2	1	1	1	1	2	0	2	1	1	2	3	1	2	2
14	304	2	18.9586	6	9	3.76954	26.3868	3	7	68.1186	1	0	2	1	1	1	2	1	1	1	1	2	1	1	1	1	0	1	2	0	1	1	1	1	1	2	1	1	2	0	1	1	1	1	0	1	1	2	2
13	255	1	16.5138	5	8	3.76633	26.3643	3	8	85	1	1	2	0	1	2	0	0	1	1	1	2	1	2	1	1	0	1	1	1	0	1	1	1	1	1	1	0	2	0	1	1	1	1	0	0	1	1	1
13	212	1	22.8325	6	8	3.7657	26.3599	3.18272	17	79.6497	2	2	2	2	2	2	1	1	1	1	1	2	1	1	1	2	1	0	1	2	2	1	2	2	2	1	2	1	1	1	2	2	2	1	2	2	2	1	2
13	532	1	16.5734	5	8	3.76042	26.3229	1.50917	10.57	77	0	1	0	1	0	1	1	1	1	1	2	1	1	1	1	1	1	0	0	1	1	1	1	1	1	1	1	1	1	1	0	0	1	2	1	1	1	0	1
13	278	1	16.7439	5	8	3.7507	26.2549	3	8	88.148	0	2	1	0	1	1	0	1	1	1	1	0	1	1	1	2	0	1	1	1	2	1	1	0	1	2	1	1	0	1	1	1	1	1	1	1	1	0	0
14	201	1	15.9176	6	9	3.74943	26.246	3.3	18	100	0	1	0	1	1	1	2	1	2	1	1	0	0	1	1	2	1	0	1	1	1	2	0	1	1	0	2	1	1	1	1	1	1	1	1	1	1	1	2
14	102	2	25.0259	11	9	3.74448	26.2113	3	14	82.2415	2	1	2	2	1	2	2	2	2	1	3	2	3	2	2	2	3	2	1	1	2	2	2	2	2	2	2	2	2	2	2	2	2	2	2	1	1	2	2
9	115	1	16.5563	5	4	3.73989	26.1793	3	18	87.5623	1	1	1	1	1	0	0	1	0	1	1	1	1	0	0	1	1	1	1	1	2	1	1	1	2	1	1	1	1	2	1	0	1	1	1	1	0	1	1
12	233	1	16.4777	4	7	3.73815	26.167	3.00455	6	83.1192	1	1	1	1	0	0	0	1	1	1	1	1	1	1	1	1	0	2	1	1	2	1	0	1	0	1	0	0	1	1	0	2	0	1	1	1	1	0	0
12	208	1	22.3962	6	7	3.73539	26.1477	3.25072	13	71.0484	2	2	1	0	2	1	1	1	1	1	1	2	2	2	2	1	1	3	1	2	2	1	1	2	2	2	1	2	1	2	1	1	2	0	1	2	1	1	1
14	331	2	15.6864	3	9	3.72366	26.0656	2.97386	7	81.4095	1	1	1	1	1	1	1	1	0	0	1	1	0	1	0	1	0	1	1	1	1	0	0	1	1	0	1	1	0	1	1	1	0	2	0	1	0	1	0
9	333	2	17.1582	3	4	3.71808	26.0266	2.94084	5	80.4336	1	1	1	2	1	1	1	1	1	1	0	1	0	0	1	1	1	1	1	2	1	1	1	1	1	1	1	1	0	0	0	1	1	1	0	2	1	0	0
10	536	2	20.0605	5	5	3.70509	25.9356	1.3	9.1	75.4446	2	2	2	1	1	1	0	1	1	1	2	1	1	1	1	1	2	1	0	2	1	1	0	1	1	1	1	2	1	0	1	1	1	1	2	1	1	1	1
13	139	1	17.3529	6	8	3.68389	25.7872	3.3	15	84.7312	1	2	0	0	1	1	1	1	1	2	1	2	2	1	0	1	2	1	2	0	1	0	1	1	1	1	1	1	1	1	0	0	1	1	1	1	1	1	1
13	35	2	14.1979	5	8	3.68374	25.7862	3	18	74.4356	1	1	0	1	0	0	0	0	0	1	1	1	0	1	1	0	0	1	1	0	0	1	0	0	1	1	2	2	1	0	1	0	0	0	0	1	0	1	1
10	378	1	18.4786	4	5	3.68348	25.7844	2.3	12	98	1	2	0	1	0	1	1	0	1	1	1	1	1	2	1	1	0	2	0	1	2	1	1	1	1	1	1	0	1	1	2	1	1	1	1	0	1	1	1
14	107	2	18.2482	5	9	3.68108	25.7676	3	10	76	1	1	1	2	1	0	2	1	1	1	0	1	2	1	2	1	1	2	1	1	1	1	2	1	0	1	1	1	1	2	1	1	1	1	2	2	1	2	2
9	145	1	18.808	6	4	3.67686	25.738	3.3	11	97	1	1	1	1	2	0	0	0	1	1	1	1	1	1	1	1	2	1	2	2	2	1	2	2	1	1	1	1	1	1	1	1	1	1	1	1	1	1	1
11	167	1	25.8501	10	6	3.67615	25.7331	3.3	11	82.9916	1	1	1	2	1	2	2	2	2	1	3	1	2	1	3	2	2	2	2	2	2	1	2	1	1	1	2	1	1	1	1	2	2	2	2	2	2	2	2
11	312	1	20.4223	7	6	3.66387	25.6471	3	6	79.0918	2	1	1	2	1	0	1	1	1	1	1	1	2	1	1	1	1	1	1	1	1	1	2	1	2	2	2	1	1	2	1	2	2	2	1	1	2	1	2
9	382	2	18.7816	6	4	3.66226	25.6358	2.3	9	82	1	2	1	1	1	1	2	1	2	1	1	1	1	0	1	2	0	2	2	1	2	1	1	1	1	1	1	1	2	2	1	1	1	2	0	2	1	1	0
10	177	2	18.1622	4	5	3.63861	25.4703	3.3	16	83.3867	1	1	1	1	1	0	1	1	2	1	1	2	1	0	2	1	0	2	1	1	2	1	2	2	1	0	0	1	2	1	0	1	0	1	1	1	2	1	1
11	428	2	14.5924	3	6	3.63542	25.448	2.3	14	80.8455	1	0	2	0	1	1	1	1	1	1	1	1	0	1	1	0	2	1	1	1	1	1	1	1	0	1	0	1	1	0	1	1	1	1	0	1	1	0	0
13	120	1	19.6133	6	8	3.63474	25.4432	3	13	84.3944	1	1	1	1	1	1	0	2	1	1	1	1	1	1	1	1	0	1	1	1	2	2	2	2	1	1	1	1	1	1	0	2	1	2	2	1	1	1	1
12	236	1	16.6386	3	7	3.61846	25.3292	3	14	76	0	0	0	0	1	1	1	2	1	0	1	1	0	1	1	1	1	1	1	0	0	0	0	2	1	2	1	1	2	1	0	1	1	0	1	0	1	1	1
10	153	1	20.1623	7	5	3.61623	25.3136	3.3	14	72.957	1	1	1	1	1	1	0	2	1	1	1	1	2	1	2	1	1	1	2	1	1	1	1	1	1	2	1	2	1	0	1	0	2	1	1	2	2	0	0
9	293	2	17.9572	5	4	3.60957	25.267	3	7	86.9958	1	1	1	0	1	2	2	1	2	1	1	2	1	2	1	0	1	2	1	1	1	1	1	1	1	1	1	1	1	1	1	0	1	1	1	1	1	1	1
11	222	2	17.0221	1	6	3.60627	25.2439	3.11366	10	86	0	1	0	1	1	1	1	1	2	0	0	1	0	1	1	1	1	1	1	1	0	0	1	0	0	0	0	1	1	1	1	1	1	1	0	1	0	1	1
8	445	1	19.2416	6	3	3.60585	25.241	2.3	10	83.2274	2	1	2	1	0	1	1	1	1	1	1	1	1	2	1	1	1	1	1	1	1	1	2	1	1	0	2	1	1	0	2	2	1	0	2	1	1	1	1
9	79	1	19.5839	8	4	3.60375	25.2263	3	12	86.5101	1	1	1	1	2	1	1	1	1	0	2	1	1	2	2	2	1	1	2	0	1	1	0	1	2	0	2	1	1	1	1	1	2	1	2	1	1	1	1
9	482	1	22.7884	9	4	3.60306	25.2214	2.3	15	87.01	2	1	1	1	1	2	1	2	2	2	2	2	2	2	2	1	1	1	1	1	2	2	2	2	1	1	2	1	2	1	2	2	2	2	1	1	2	2	1
12	290	2	18.6869	5	7	3.59195	25.1437	3	5	82.2311	1	2	1	1	1	1	1	1	1	1	1	1	1	2	2	0	1	1	0	2	1	1	0	1	1	2	2	1	0	1	2	0	1	1	2	1	1	1	1
11	66	1	22.9408	7	6	3.57871	25.051	3	13	79.2372	2	1	2	1	1	2	2	3	1	2	2	2	2	1	1	2	2	2	1	2	1	1	2	2	2	1	1	1	2	2	1	1	2	2	2	2	2	2	2
9	147	2	16.1279	5	4	3.57788	25.0452	3.3	19	77.4606	1	0	1	0	1	1	1	2	1	1	1	1	1	1	1	1	1	1	1	1	1	1	1	1	0	0	1	0	1	1	1	1	0	1	0	1	1	1	1
8	151	2	20.0665	8	3	3.57688	25.0381	3.3	15	79.5232	0	1	1	1	1	2	1	2	1	2	1	1	2	1	2	1	1	1	1	2	1	2	1	1	2	1	2	1	1	1	1	1	1	2	1	1	2	1	2
14	16	1	18.678	6	9	3.5749	25.0243	3	12	80.6988	1	1	2	0	1	1	2	1	0	1	1	1	2	1	1	2	0	1	1	1	0	1	1	1	0	1	1	1	0	1	2	2	2	0	2	1	1	1	1
13	360	1	21.5173	6	8	3.54942	24.846	2.32812	7	59.5303	2	1	2	2	1	2	0	2	2	1	1	2	2	1	1	1	1	2	1	1	2	1	2	1	2	2	1	1	1	1	1	1	1	1	1	0	2	1	0
9	140	1	23.1279	8	4	3.5479	24.8353	3.3	15	74.5383	2	2	2	2	2	2	2	1	1	2	2	1	1	1	1	2	3	2	2	1	2	2	1	1	2	1	1	1	2	1	2	2	1	1	1	1	1	2	2
10	324	1	15.1905	5	5	3.54735	24.8315	3	13	77	0	1	1	1	1	1	1	1	0	1	1	0	1	1	1	2	1	1	1	0	1	1	1	1	1	1	1	1	1	1	1	0	1	1	1	1	1	1	1
13	75	1	19.3362	5	8	3.54535	24.8174	3	5	88.3995	1	1	1	1	2	1	2	2	2	1	1	1	1	1	1	1	1	1	0	0	1	1	2	2	0	2	2	1	1	1	1	2	0	1	1	1	1	2	0
14	136	1	15.827	3	9	3.54025	24.7818	3.3	18	93.5272	1	1	0	1	1	0	1	1	1	1	1	0	0	1	1	0	0	0	1	0	1	1	1	1	1	0	0	1	1	1	1	1	1	1	1	2	2	0	2
14	283	2	15.6372	6	9	3.53758	24.7631	3	4	83.8315	1	1	0	1	0	0	1	0	0	0	1	1	1	1	1	1	2	1	1	1	1	2	1	1	1	1	1	0	2	1	1	0	1	1	1	1	0	0	2
12	162	2	17.4483	2	7	3.53057	24.714	3.3	15	69.3862	1	1	1	1	1	1	0	0	0	1	0	1	0	1	1	1	0	1	0	0	2	1	1	1	1	0	1	0	0	0	1	2	1	1	1	0	1	0	1
13	217	1	23.3171	9	8	3.52669	24.6868	3.14564	14	68.1949	2	1	1	2	2	1	2	1	1	0	2	1	2	0	2	2	0	2	2	1	2	2	3	1	2	2	1	2	2	1	1	1	1	2	1	2	2	2	1
8	224	2	19.8243	7	3	3.51405	24.5983	3.07895	8	85.5378	1	1	0	1	0	2	1	1	1	2	2	1	1	2	1	1	1	2	2	2	2	1	1	1	1	1	1	2	1	2	1	1	1	2	1	1	0	1	0
12	125	1	17.3813	4	7	3.49881	24.4917	3	9	96	1	0	1	1	0	2	1	1	2	1	0	2	1	2	1	1	1	0	1	1	0	1	1	1	1	1	1	1	0	1	1	1	2	1	0	1	1	1	0
14	111	1	17.0479	6	9	3.49316	24.4522	3	6	88.0747	1	0	2	0	2	0	1	0	1	1	1	1	1	1	0	1	2	1	2	1	0	1	1	2	1	1	1	1	1	1	1	1	1	1	2	1	1	0	0
10	490	1	18.8555	6	5	3.48891	24.4224	2.3	15	86.4447	0	1	2	2	1	1	1	1	1	1	1	0	1	2	1	0	1	2	2	1	1	1	2	0	1	0	1	2	1	0	1	1	1	1	1	1	1	1	2
11	89	1	16.9818	5	6	3.4854	24.3978	3	14	71.7596	1	0	0	1	1	1	2	1	1	1	0	1	1	1	1	1	1	1	1	1	1	2	0	1	1	0	1	1	1	0	1	1	0	0	0	1	0	0	1
8	325	2	17.9618	4	3	3.47625	24.3337	3	12	83	2	1	2	2	1	0	1	0	1	1	1	1	0	1	0	1	1	1	1	1	1	1	1	0	0	1	1	1	2	2	2	1	1	1	1	0	1	1	1
12	176	1	19.6081	6	7	3.47299	24.3109	3.3	17	77.0215	1	1	1	2	1	1	0	1	2	1	1	1	1	0	2	1	2	2	2	0	0	1	1	1	2	2	1	0	1	1	1	1	2	1	1	1	2	1	1
11	509	2	14.1263	2	6	3.45543	24.188	2.3	15	81.12	0	1	1	1	1	0	1	1	1	2	0	0	0	0	1	1	2	1	1	2	1	1	1	1	1	0	0	1	1	1	0	1	0	1	1	1	0	1	1
10	385	2	13.9239	0	5	3.45395	24.1777	2.3	6	77	1	2	0	1	0	2	1	0	1	1	0	0	0	1	1	1	0	0	0	1	0	0	1	0	1	1	0	0	0	1	1	0	1	1	0	1	0	1	1
11	375	2	18.7979	6	6	3.42779	23.9945	2.3	15	86.0031	0	1	2	1	2	0	1	2	1	1	1	1	1	1	1	1	1	1	2	2	1	1	0	1	1	1	1	1	1	1	1	1	1	1	1	1	1	1	2
12	421	1	19.8486	5	7	3.40276	23.8193	2.3	10	75.283	1	1	1	1	1	1	1	1	1	1	2	1	1	1	1	1	1	2	0	1	0	1	1	1	1	2	1	1	2	1	1	1	0	2	1	1	0	1	1
10	24	2	21.6177	9	5	3.40019	23.8014	3	5	56.8201	1	1	1	1	1	1	1	1	1	1	2	1	2	0	1	2	1	1	2	1	2	1	1	1	2	1	2	2	1	1	1	2	2	1	1	1	0	1	1
14	451	1	17.4324	4	9	3.39029	23.732	2.3	15	61.397	2	1	1	0	1	1	1	1	1	1	1	1	1	1	1	1	2	0	0	1	0	1	2	2	1	0	1	0	0	1	1	1	1	1	1	1	1	1	1
11	423	1	19.3545	8	6	3.38606	23.7024	2.3	20	68.1502	1	2	1	1	1	2	1	1	2	1	1	1	1	1	2	1	0	1	2	2	2	2	1	1	0	1	2	1	2	1	1	1	2	0	1	1	2	2	1
8	404	2	17.645	5	3	3.37802	23.6461	2.3	11	88.4558	1	1	2	1	2	1	1	1	0	1	1	1	1	1	1	1	1	1	1	0	1	1	0	0	1	1	1	1	1	0	1	1	1	1	1	1	1	0	1
14	307	2	20.6785	3	9	3.37704	23.6393	3	5	81.4439	2	1	1	0	1	1	1	2	2	1	1	2	1	1	1	1	1	1	0	1	2	1	3	2	1	1	0	1	1	1	2	2	2	2	1	1	1	1	2
10	334	1	22.5775	6	5	3.3736	23.6152	2.91598	15	69.7727	2	1	2	1	2	1	1	1	1	1	2	2	1	2	1	2	2	1	1	1	1	1	1	1	2	1	1	2	2	1	2	1	1	1	2	1	2	1	2
10	488	1	15.2636	4	5	3.37203	23.6042	2.3	15	89.3273	1	1	1	1	0	1	2	1	1	1	1	1	1	1	1	1	0	0	1	0	1	0	0	2	0	0	1	0	0	2	1	1	2	1	1	0	1	1	0
9	474	2	22.1171	5	4	3.36646	23.5652	2.3	15	69.5724	1	1	2	1	2	1	1	2	2	2	1	1	0	2	2	2	2	1	2	1	1	1	2	2	2	3	1	2	1	2	2	1	1	2	2	1	1	1	1
13	161	1	14.6944	2	8	3.36203	23.5342	3.3	15	95	1	0	0	1	1	2	1	1	0	0	2	0	0	0	2	1	1	1	0	1	1	0	1	1	1	1	0	0	1	0	1	1	1	1	1	0	0	1	1
10	90	1	15.5542	5	5	3.34853	23.4397	3	13	86.2041	1	1	2	0	1	0	1	1	1	1	1	1	1	0	1	0	0	1	1	0	1	2	0	2	1	0	0	0	0	1	0	1	0	1	1	1	1	1	0
13	64	1	19.2137	7	8	3.3393	23.3751	3	15	62.3342	1	2	1	2	1	1	1	2	0	2	1	1	1	1	1	2	1	1	2	1	2	1	1	1	1	1	2	2	1	1	1	1	1	2	1	1	1	0	2
10	272	1	17.7931	3	5	3.33657	23.356	3	7	73.9251	1	1	1	1	2	1	1	2	1	1	1	1	1	1	1	0	0	1	0	1	1	1	1	1	1	1	0	1	1	1	1	2	0	2	1	2	2	2	1
9	289	2	21.131	7	4	3.32647	23.2853	3	6	70.2057	1	2	1	2	2	1	1	2	1	1	1	0	1	1	2	1	1	1	2	1	1	2	1	1	2	1	1	1	1	1	2	1	1	2	1	2	2	1	2
11	152	2	19.4149	7	6	3.32626	23.2838	3.3	15	81.3305	1	2	2	1	1	2	1	0	0	2	1	1	1	1	1	0	2	2	1	0	1	2	2	1	1	1	2	2	1	1	1	1	2	1	1	1	1	1	1
8	465	2	18.6516	7	3	3.32518	23.2762	2.3	7	85	1	1	1	0	1	0	0	2	1	2	1	1	2	1	0	1	1	1	1	2	1	1	0	1	1	1	2	1	2	1	2	2	1	2	1	1	1	1	1
11	220	2	19.2969	3	6	3.31941	23.2359	3.12827	12	85.7483	1	2	1	1	1	1	1	1	1	1	0	0	1	2	1	2	1	1	0	1	1	1	1	1	2	2	1	1	1	1	1	1	2	1	1	1	1	2	1
14	186	1	19.5883	8	9	3.29778	23.0845	3.3	17	70.5951	1	1	1	1	1	1	1	1	1	1	2	1	1	2	1	1	1	0	1	1	1	2	0	1	1	0	2	1	2	1	1	1	2	2	1	1	1	2	1
12	29	2	16.9454	5	7	3.29581	23.0707	3	15	81	2	1	1	1	1	2	1	1	1	1	1	1	0	1	1	1	2	1	2	1	0	1	0	1	0	1	1	1	1	0	2	1	2	1	0	1	1	1	2
8	513	2	21.9913	5	3	3.29058	23.0341	2.3	15	74.4635	1	2	2	2	2	2	2	1	1	2	0	2	2	2	1	2	2	1	1	1	1	1	2	1	1	2	1	1	1	2	2	1	1	2	2	1	1	1	2
12	500	2	17.8036	6	7	3.28585	23.0009	2.3	15	73.7944	1	1	1	1	1	1	1	0	0	1	1	1	2	1	0	1	2	2	1	1	1	2	1	1	2	0	0	1	1	1	0	1	1	1	1	1	1	1	1
10	534	2	23.7709	8	5	3.28557	22.999	1.44926	10.15	84.5273	1	1	2	2	2	1	1	1	2	1	1	1	1	1	1	2	1	2	2	1	1	2	2	0	2	1	2	3	1	1	2	2	1	1	1	2	1	2	2
9	238	1	19.1268	7	4	3.27296	22.9107	3	12	91	1	2	2	0	1	1	1	1	1	0	1	1	2	1	1	1	1	1	1	2	1	1	1	1	1	1	2	0	0	2	1	2	1	2	1	1	1	1	0
14	144	1	20.5736	6	9	3.26965	22.8875	3.3	12	82.927	2	1	1	1	1	1	2	1	2	1	0	1	2	1	1	2	1	1	0	2	2	2	1	0	1	1	2	2	1	1	1	1	1	2	1	2	1	1	2
8	218	1	17.4273	6	3	3.2655	22.8585	3.14405	13	83	1	1	1	1	1	0	1	1	0	0	1	1	1	1	1	1	2	1	1	0	2	2	1	1	1	0	1	2	1	1	1	1	1	1	0	1	1	0	0
13	21	2	16.9304	6	8	3.26363	22.8454	3	8	65.9635	0	1	1	1	1	0	1	1	1	0	2	0	1	1	1	2	1	1	1	1	1	2	1	0	0	1	0	1	1	1	2	0	1	1	2	1	1	1	1
8	269	1	18.2631	5	3	3.24879	22.7415	3	10	85.5099	1	0	1	0	1	2	0	1	0	1	1	1	1	1	2	1	1	1	1	1	0	1	1	1	1	1	1	1	1	0	1	0	1	1	2	1	1	1	1
10	171	1	17.8447	6	5	3.24798	22.7358	3.3	7	81.2092	2	1	1	1	0	1	0	1	0	1	2	1	1	2	1	0	1	1	1	1	1	1	0	1	1	1	1	2	1	1	1	2	1	1	1	0	1	0	1
10	117	1	19.1148	5	5	3.24781	22.7347	3	15	86.3856	2	1	1	2	1	2	0	1	1	1	1	1	2	1	3	1	1	2	1	0	1	0	1	1	2	2	1	2	1	1	1	0	0	2	2	0	2	2	1
8	226	2	20.4377	6	3	3.23722	22.6605	3.03251	6	79.3567	1	2	2	1	2	1	1	1	1	1	1	2	1	2	1	1	1	1	2	2	1	1	1	2	2	2	1	1	1	1	2	0	2	1	0	1	0	2	1
10	185	1	17.8797	6	5	3.23211	22.6248	3.3	17	85.961	1	1	1	1	0	1	1	1	0	1	1	0	1	1	1	1	1	1	1	1	2	1	1	1	0	1	2	1	1	1	1	2	1	0	1	1	1	1	1
13	159	2	19.8684	6	8	3.23017	22.6112	3.3	17	88.8865	1	1	2	1	2	1	1	1	1	1	2	1	1	2	2	2	1	2	1	2	2	1	1	1	1	0	1	1	1	0	1	2	1	1	1	2	1	1	1
12	388	2	18.3296	5	7	3.22939	22.6057	2.3	14	81	1	1	1	1	2	1	1	1	2	1	1	1	1	1	0	1	1	1	1	1	1	0	1	1	2	1	2	1	1	1	2	2	2	1	1	0	0	1	1
12	77	1	18.0452	5	7	3.21961	22.5372	3	14	73.6783	1	1	1	1	1	1	0	0	1	1	1	0	1	1	1	1	1	2	1	1	2	1	1	1	1	1	1	1	1	0	1	1	0	1	1	1	0	1	0
13	335	2	19.6044	4	8	3.20189	22.4132	2.90794	14	53.5555	2	1	1	1	1	1	0	0	2	1	1	1	1	1	1	1	1	1	1	1	2	0	1	1	1	1	1	0	2	2	1	1	1	1	1	1	2	2	1
11	59	2	19.4553	4	6	3.20136	22.4095	3	9	85	1	0	1	1	0	0	2	1	1	1	1	1	1	1	2	0	0	1	0	1	1	1	1	1	1	1	1	1	0	1	1	2	0	2	2	2	2	1	1
13	475	2	18.4176	5	8	3.187	22.309	2.3	15	87	1	1	1	1	2	2	2	0	1	0	0	1	1	1	1	1	0	1	1	1	1	2	2	1	1	1	1	1	0	1	2	1	1	1	2	1	2	1	2
12	274	1	16.3159	3	7	3.18596	22.3017	3	5	86.907	2	1	0	1	1	0	1	0	2	2	0	0	1	1	1	1	2	1	0	1	1	1	1	1	1	0	1	1	2	1	1	1	1	0	0	1	0	1	1
10	373	2	17.7765	4	5	3.18594	22.3016	2.3	16	74.4802	1	1	1	3	1	1	1	1	1	1	0	1	1	1	1	1	1	1	1	1	1	1	1	2	1	0	1	1	1	1	1	2	1	1	1	2	0	1	1
13	31	1	17.3354	7	8	3.18383	22.2868	3	14	60.6684	2	1	1	1	1	1	0	1	1	1	1	1	1	1	1	2	1	1	2	1	1	2	0	0	1	1	1	1	1	0	1	1	1	2	1	1	1	1	0
9	468	1	22.0402	7	4	3.17912	22.2538	2.3	6	86.4827	2	1	2	0	1	2	0	2	2	1	2	0	1	1	0	1	2	1	1	1	1	1	0	2	1	1	2	2	1	1	2	1	2	1	0	1	1	1	1
10	209	2	18.248	6	5	3.1789	22.2523	3.2424	12	80.5108	1	1	1	1	1	1	1	1	0	1	1	0	1	2	1	1	1	1	1	2	1	1	1	1	1	0	2	1	1	1	1	1	1	1	1	1	1	2	2
10	81	2	19.2007	6	5	3.15828	22.108	3	11	75.9277	1	1	1	1	1	2	1	1	1	2	2	1	1	2	0	1	1	2	0	0	0	2	1	2	1	2	1	1	1	1	1	1	1	1	1	1	1	1	1
12	432	2	19.5756	5	7	3.1535	22.0745	2.3	11	84.6227	1	1	3	1	1	2	1	0	0	1	0	2	1	0	0	2	1	2	2	1	2	1	0	0	2	1	1	1	1	1	2	2	1	1	1	0	1	0	1
14	45	1	19.3753	6	9	3.14201	21.994	3	11	84.1988	1	1	1	1	1	2	1	2	1	2	2	1	1	1	2	1	0	1	2	1	1	1	2	1	0	1	0	1	1	2	1	1	1	2	1	2	1	1	1
8	202	1	15.4544	3	3	3.13108	21.9175	3.3	17	86.5445	2	0	1	0	0	1	1	1	1	1	0	0	0	0	0	1	1	1	2	0	1	1	1	1	1	0	0	0	1	1	2	1	1	1	1	1	1	0	1
8	195	1	15.4592	4	3	3.12981	21.9087	3.3	10	93.1408	1	1	1	1	0	1	0	1	1	1	1	1	0	1	1	1	1	0	1	1	1	1	1	2	0	0	1	0	1	1	0	0	2	0	1	0	0	2	1
11	39	1	22.1021	7	6	3.12954	21.9068	3	15	81.315	2	2	2	0	1	1	2	1	1	2	1	2	1	2	1	2	2	2	2	1	1	1	1	2	2	1	2	2	2	2	2	1	1	2	2	2	1	2	1
8	461	1	11.6679	3	3	3.11802	21.8262	2.3	6	95	0	0	0	0	1	0	0	1	0	0	1	0	1	1	0	0	0	0	1	0	0	0	0	1	1	0	0	0	0	0	0	0	0	0	1	0	0	1	0
13	160	2	17.9899	5	8	3.10848	21.7594	3.3	16	83	0	1	2	1	1	1	2	1	1	1	1	1	1	1	1	0	1	1	1	1	0	1	0	1	1	1	1	1	1	1	2	2	1	0	1	1	1	1	1
10	440	2	15.6884	6	5	3.10748	21.7524	2.3	14	89	1	0	1	0	0	0	1	1	1	1	1	1	1	0	0	0	1	1	2	1	1	2	1	1	1	1	0	1	1	1	1	1	0	0	1	0	1	0	1
13	463	2	14.8665	4	8	3.10628	21.7439	2.3	5	83.6357	0	1	0	1	1	1	0	0	1	1	1	1	1	1	1	0	0	1	1	0	0	0	1	1	1	0	1	0	1	0	0	0	0	1	1	1	0	1	1
13	367	2	15.659	3	8	3.10299	21.7209	2.3	5	86.218	1	1	1	0	1	1	0	1	1	0	1	0	1	1	2	1	0	1	0	0	0	1	1	1	0	1	0	1	0	1	1	1	0	2	1	0	1	1	1
8	61	2	17.7697	7	3	3.10019	21.7013	3	7	73.244	1	1	1	1	1	1	1	1	2	2	2	1	1	1	1	1	1	1	1	1	1	2	2	2	0	1	1	1	2	1	1	1	1	2	1	1	1	1	1
13	356	2	22.1988	8	8	3.09988	21.6992	2.3661	6	82.5155	2	2	1	2	2	1	2	1	1	2	1	2	2	0	2	1	1	2	2	2	1	1	2	2	2	1	2	1	1	1	2	2	1	2	1	2	2	0	2
14	260	1	21.1554	7	9	3.09797	21.6858	3	6	79.4831	1	1	1	1	1	2	2	1	0	1	2	1	2	2	1	1	1	2	1	1	1	1	2	1	1	1	1	1	2	1	1	2	2	2	1	1	2	2	2
11	348	1	20.2473	6	6	3.09003	21.6302	2.55369	13	72.2438	1	1	2	1	1	0	1	2	1	1	1	1	1	1	1	1	2	2	2	1	2	1	2	1	1	1	1	1	2	1	1	1	0	1	1	1	1	2	1
9	393	2	16.3087	3	4	3.08375	21.5863	2.3	10	69.5292	1	1	0	1	2	0	1	1	1	0	1	1	0	2	1	1	1	0	1	2	2	0	1	1	1	0	1	1	1	1	1	1	1	0	0	1	1	1	1
11	86	2	21.9795	8	6	3.07985	21.5589	3	6	87.5308	2	0	2	2	1	1	2	2	2	2	2	1	1	2	1	1	1	2	1	1	1	2	1	1	1	2	2	1	1	2	1	1	2	1	2	2	1	1	1
10	321	1	18.0426	4	5	3.06632	21.4643	3	15	81.8702	1	2	1	1	1	1	1	1	1	1	1	2	1	1	1	2	2	2	1	0	1	1	1	0	2	1	0	1	0	1	2	1	1	1	1	1	2	1	1
8	327	2	13.903	3	3	3.0609	21.4263	3	11	89.2421	1	0	0	1	1	1	0	0	1	2	0	1	1	1	1	2	1	1	1	0	0	1	0	1	1	1	0	1	0	0	1	0	0	1	1	0	1	1	0
9	459	1	20.3991	4	4	3.05578	21.3904	2.3	8	79.2506	2	1	2	1	2	1	1	1	2	1	1	1	0	1	2	1	1	1	1	1	1	1	1	2	2	0	1	2	1	1	1	1	1	1	1	1	1	1	1
8	141	2	21.4282	6	3	3.04778	21.3345	3.3	14	75.768	0	2	2	3	1	1	2	2	2	2	2	1	1	1	1	1	1	1	1	2	2	1	1	1	1	1	1	1	1	1	1	1	0	3	1	1	1	1	1
11	499	2	20.7341	7	6	3.04753	21.3327	2.3	15	77.0536	1	2	1	1	0	2	0	1	2	1	1	1	1	1	1	1	1	1	2	2	2	1	0	3	1	1	2	1	2	1	1	1	1	0	3	2	1	2	2
8	315	1	20.8505	7	3	3.04145	21.2901	3	4	79.1036	2	2	1	1	2	2	2	1	1	1	2	2	1	2	2	1	1	1	1	1	1	2	1	2	1	0	1	1	0	0	1	2	2	1	1	1	2	1	2
8	106	2	15.3083	5	3	3.01771	21.124	3	11	77	0	0	1	1	1	0	1	1	1	0	1	0	2	1	0	0	1	1	1	1	1	1	1	0	0	1	0	1	1	2	1	1	0	0	1	1	2	1	1
11	98	2	19.4033	3	6	3.00664	21.0465	3	7	96	1	1	1	1	1	2	2	1	2	0	1	1	0	1	1	0	0	1	1	1	2	0	1	2	2	2	1	1	0	1	2	0	1	1	1	1	1	1	1
12	175	1	20.4172	5	7	3.0025	21.0175	3.3	17	81	2	0	1	1	1	1	1	1	1	1	0	1	2	2	1	2	1	1	1	1	2	1	1	2	1	2	1	1	1	1	1	1	1	1	1	1	1	1	0
9	402	2	18.8919	4	4	2.9893	20.9251	2.3	12	83.7559	0	2	1	1	0	1	2	1	1	1	1	1	0	1	2	2	1	1	0	2	1	1	1	1	1	1	2	1	2	2	1	2	2	0	1	2	1	0	1
8	287	2	14.2853	2	3	2.9866	20.9062	3	8	95	1	1	1	0	1	0	0	1	1	1	0	1	1	1	1	0	0	0	1	0	1	0	1	1	1	1	0	1	1	0	1	0	1	1	1	0	1	1	0
11	92	2	23.7177	6	6	2.96565	20.7595	3	12	78.7036	2	2	2	1	2	2	2	2	2	2	1	2	1	1	3	2	1	1	1	2	2	1	2	1	1	1	2	2	1	2	2	1	1	1	1	2	1	2	1
8	83	1	22.7674	5	3	2.96231	20.7361	3	9	61.4672	1	1	2	1	2	1	1	2	1	1	1	1	2	1	2	2	1	2	1	2	1	0	1	1	2	2	1	2	1	1	1	2	2	1	1	1	1	1	1
12	389	2	21.3889	6	7	2.96092	20.7265	2.3	13	82	2	1	2	1	1	1	2	1	2	1	1	2	1	1	1	2	1	2	1	1	2	1	2	2	2	2	2	1	1	2	1	1	2	2	1	2	2	1	1
8	447	1	17.294	5	3	2.96057	20.724	2.3	8	82.7418	0	1	1	1	2	1	1	1	0	1	1	1	1	1	2	1	1	1	1	0	1	1	1	0	2	2	1	2	1	0	0	1	0	1	2	0	1	0	1
13	8	1	18.237	4	8	2.9603	20.7221	3	18	100	2	1	1	2	2	1	1	1	1	2	1	1	0	1	0	1	0	1	2	1	1	1	2	2	0	0	0	0	1	1	1	2	1	0	2	1	1	1	1
13	441	1	16.9436	4	8	2.95549	20.6885	2.3	13	79	0	1	1	1	1	0	1	1	1	1	1	1	1	1	1	1	1	0	2	1	1	0	2	1	1	1	0	2	1	1	1	0	0	1	0	1	1	0	1
8	363	2	11.8124	2	3	2.9459	20.6213	2.3	6	88	1	0	0	1	1	0	1	1	0	1	1	0	0	1	2	0	0	0	1	0	0	0	1	0	0	1	0	0	1	1	0	0	0	0	0	0	0	0	0
11	189	1	17.3994	5	6	2.9342	20.5394	3.3	15	98	0	1	1	1	1	1	1	1	1	2	1	0	1	1	2	0	1	1	0	1	1	2	1	0	1	1	1	0	1	1	1	1	1	2	0	1	1	1	1
13	460	2	13.4305	0	8	2.93212	20.5248	2.3	7	93.0746	2	0	0	1	1	0	0	1	1	1	0	0	0	1	0	1	2	0	0	0	0	0	1	0	1	0	0	0	0	0	0	0	0	0	1	1	1	0	1
13	184	1	16.7099	2	8	2.91741	20.4218	3.3	18	100	1	1	0	1	2	1	1	1	1	1	0	1	1	0	1	0	1	1	0	1	1	0	2	1	1	0	1	1	1	1	1	0	0	1	1	1	2	2	1
8	38	1	19.9532	8	3	2.90094	20.3066	3	17	83	1	1	1	1	2	1	2	1	1	0	2	1	2	1	1	1	2	1	1	1	2	1	1	1	1	1	2	1	1	0	2	1	1	1	1	1	1	1	1
12	127	2	16.7812	5	7	2.89727	20.2809	3.3	18	74.9634	0	1	1	1	0	1	1	0	1	0	1	0	1	1	2	0	1	0	1	1	2	1	1	1	1	1	1	1	2	1	1	1	1	1	1	0	1	2	1
9	3	1	18.4445	7	4	2.89613	20.2729	3	15	65.2203	2	1	1	2	0	1	1	1	1	1	2	1	1	2	2	1	1	1	2	1	1	1	1	1	1	1	1	0	1	1	1	1	1	1	1	1	1	1	1
11	7	1	19.7973	5	6	2.89495	20.2646	3	12	71.8941	1	1	1	1	1	1	2	2	1	0	2	0	0	2	2	1	1	1	1	1	1	0	1	0	1	1	2	1	1	1	1	1	1	1	1	1	1	1	1
11	399	2	16.1181	2	6	2.87518	20.1263	2.3	15	68.6481	1	1	1	1	1	1	1	1	1	1	0	1	0	1	1	0	0	0	1	0	1	0	1	0	0	0	1	0	1	1	1	0	2	1	1	2	2	1	1
8	211	2	20.4747	8	3	2.87107	20.0975	3.18928	18	73.1052	1	2	1	1	1	2	1	0	1	1	1	1	2	2	1	1	1	2	1	0	2	2	2	1	1	2	2	1	2	1	1	1	2	1	1	1	2	1	0
13	458	1	16.875	2	8	2.86395	20.0476	2.3	9	79.6244	1	1	1	0	1	1	1	1	0	0	0	1	0	1	1	2	2	1	0	1	1	1	1	1	2	0	1	1	2	1	1	1	2	2	0	1	1	1	1
12	355	1	19.4003	5	7	2.84524	19.9167	2.39679	7	73.7112	2	1	2	1	2	1	1	0	1	1	1	1	1	1	1	0	1	1	1	1	1	1	1	1	1	1	1	1	2	1	0	1	1	1	1	2	0	1	2
14	204	1	16.4463	4	9	2.8435	19.9045	3.3	16	89.3807	1	2	1	0	1	1	0	0	1	1	0	0	1	1	1	1	1	2	2	0	1	1	2	1	0	0	0	1	1	0	0	1	0	0	2	1	1	1	1
11	53	1	15.1913	4	6	2.84102	19.8871	3	14	83.9814	1	0	0	0	1	1	1	1	0	0	1	1	1	0	1	2	0	0	1	1	1	0	0	0	1	1	1	2	0	1	1	1	1	0	0	0	1	0	0
8	32	2	17.6264	5	3	2.82819	19.7973	3	13	79.8755	1	2	1	1	1	1	1	1	1	2	1	1	1	1	1	1	1	1	1	1	1	1	1	0	0	2	1	1	1	1	1	0	1	1	1	1	1	1	1
14	266	1	19.8702	5	9	2.82655	19.7858	3	4	81	2	0	2	1	1	1	1	1	1	2	1	0	1	1	1	2	2	1	0	1	1	2	2	0	2	0	1	2	1	1	0	1	1	2	2	1	1	1	0
9	291	2	13.3978	2	4	2.8236	19.7652	3	5	95	1	0	1	1	1	0	1	1	1	1	0	1	1	0	1	0	0	0	0	1	0	0	0	1	1	1	1	1	0	1	0	1	0	1	0	1	1	0	0
14	493	1	15.3733	2	9	2.81777	19.7244	2.3	15	85.793	1	0	1	0	1	1	0	1	1	0	1	2	0	1	1	1	2	1	0	0	1	0	1	1	0	0	1	1	2	1	1	1	1	0	1	1	1	0	0
12	109	1	11.6419	3	7	2.81197	19.6838	3	8	96	0	0	0	0	1	0	0	0	0	0	1	0	1	1	0	0	0	0	1	1	1	0	1	1	1	1	0	0	1	1	0	0	0	0	0	2	0	0	0
10	302	2	13.1982	3	5	2.81006	19.6704	3	9	87.1171	1	0	1	1	0	0	0	1	1	0	0	1	1	1	1	0	0	1	1	0	0	0	1	0	0	1	1	1	1	1	1	1	1	0	0	0	1	1	0
12	9	2	17.2103	4	7	2.8012	19.6084	3	17	80.1518	0	2	0	1	0	1	1	1	1	1	1	0	1	1	1	1	1	1	0	1	1	1	1	1	1	1	1	1	1	2	0	0	1	0	0	2	2	0	0
8	155	2	20.4955	6	3	2.79539	19.5678	3.3	12	79.358	1	1	2	2	2	2	2	1	1	1	1	1	1	1	1	1	1	2	1	1	1	2	1	2	1	0	1	1	1	1	1	1	2	2	2	1	1	1	1
13	410	2	15.1991	4	8	2.78224	19.4757	2.3	5	60.1727	0	1	0	1	0	0	2	0	1	1	0	0	2	2	1	0	1	1	1	1	1	1	1	0	0	1	0	2	1	0	0	1	1	1	0	1	1	1	1
8	456	2	17.7298	6	3	2.77404	19.4183	2.3	11	93.4339	1	0	0	1	1	1	1	0	2	1	0	2	1	1	1	0	1	1	2	1	1	1	1	1	0	1	2	1	1	0	1	0	0	1	1	2	0	1	0
11	448	1	13.4563	5	6	2.76803	19.3762	2.3	7	76.5555	0	0	0	1	1	1	1	1	1	0	1	1	1	0	0	1	0	0	1	1	0	1	1	0	1	0	1	0	0	0	0	1	1	0	1	0	1	0	0
9	298	2	16.2774	5	4	2.75761	19.3033	3	4	95	1	1	1	0	2	1	1	0	1	1	2	1	1	1	1	0	2	0	1	2	2	1	1	1	1	1	0	1	1	0	1	1	0	1	1	2	1	0	0
11	501	2	19.7033	7	6	2.75339	19.2737	2.3	15	86.4376	1	1	2	2	1	2	0	2	1	2	1	1	2	0	2	2	1	1	1	2	1	1	1	1	1	0	2	1	1	1	1	1	2	1	1	1	2	1	1
14	253	1	12.9616	3	9	2.7452	19.2164	3	10	92	1	1	0	1	1	0	1	0	1	0	0	1	1	1	0	1	0	0	0	1	1	0	0	0	1	1	2	0	1	0	0	0	1	0	0	1	1	1	0
10	292	2	15.4718	7	5	2.73785	19.165	3	6	82.2672	0	1	1	0	1	1	0	1	1	2	1	0	1	1	1	0	0	0	2	1	0	1	1	0	1	1	2	0	0	0	0	1	0	1	0	1	2	1	1
10	365	2	17.1792	6	5	2.73501	19.1451	2.3	4	88	2	1	0	1	1	1	1	0	1	2	1	1	1	1	0	1	2	1	2	2	0	1	1	0	1	1	1	1	1	1	1	2	1	0	1	1	1	2	1
12	282	2	17.0419	4	7	2.73262	19.1283	3	4	65.9318	1	2	1	1	1	1	2	0	0	0	1	1	0	1	1	0	0	0	1	1	2	1	0	1	2	2	1	1	2	0	1	2	1	0	1	1	1	1	1
8	398	2	18.4296	7	3	2.72542	19.0779	2.3	5	85.4407	1	2	2	2	1	1	1	0	2	1	2	1	1	1	1	1	1	1	2	1	2	1	1	2	2	2	1	1	2	1	1	1	2	2	1	0	0	1	0
14	85	1	11.477	1	9	2.72424	19.0697	3	7	88	0	0	0	0	1	0	2	1	0	0	0	1	1	1	0	0	1	1	0	0	0	0	0	0	0	1	0	1	0	1	0	0	0	1	0	0	1	0	1
8	71	2	19.8798	6	3	2.7182	19.0274	3	9	79.5458	1	2	1	1	0	2	2	0	1	1	1	1	1	2	1	1	1	0	1	2	1	1	2	1	2	1	2	1	0	2	1	2	1	2	2	2	1	1	1
11	243	1	14.1269	3	6	2.70765	18.9536	3	8	88	1	1	0	1	1	1	1	1	1	1	1	1	1	1	0	0	0	0	0	1	0	1	0	0	0	1	0	0	1	0	1	0	1	0	0	1	0	1	0
10	386	2	17.8845	4	5	2.70631	18.9441	2.3	5	80.1733	1	2	1	1	2	1	1	1	0	1	0	1	1	1	0	1	1	1	2	1	1	1	1	0	1	1	0	0	1	0	0	1	1	1	1	1	2	0	1
14	271	1	15.7211	4	9	2.70566	18.9396	3	8	86.5339	2	1	1	1	1	1	0	1	0	0	1	1	0	1	2	1	1	1	1	1	0	1	1	1	1	0	1	1	2	1	1	1	1	0	1	1	1	0	0
12	412	1	20.4951	7	7	2.70207	18.9145	2.3	6	74.7561	0	1	2	1	1	2	1	1	2	1	2	1	1	0	0	1	2	2	2	2	2	1	0	1	2	2	1	2	2	1	1	2	2	1	1	1	1	1	0
11	197	1	15.7293	4	6	2.70026	18.9018	3.3	8	81.2947	1	1	1	1	1	1	0	1	2	1	0	1	2	1	1	1	0	1	1	1	1	1	0	0	1	0	0	1	1	1	0	0	1	1	1	1	0	0	2
14	264	1	20.7649	7	9	2.69571	18.8699	3	6	85.2896	1	1	2	2	1	1	2	2	2	2	2	1	2	2	1	1	1	2	1	2	1	1	2	1	1	2	1	1	2	1	1	2	1	1	1	2	1	1	1
11	489	2	18.207	6	6	2.68798	18.8158	2.3	15	86.3422	1	1	1	1	1	1	1	1	0	2	1	0	2	1	1	2	1	1	2	1	2	0	1	0	1	1	1	1	0	1	1	1	1	1	1	0	1	1	1
13	138	1	13.9719	4	8	2.68776	18.8143	3.3	16	84.1837	1	1	0	1	1	1	1	1	0	2	1	1	1	1	1	1	0	1	1	1	0	1	0	1	0	1	0	1	1	1	0	0	1	1	1	2	1	1	0
10	135	1	17.2924	5	5	2.68655	18.8059	3.3	19	88.8776	1	1	1	2	0	1	0	1	1	1	0	1	1	1	1	1	1	1	1	1	0	1	1	1	0	2	2	1	2	0	1	1	1	0	1	2	0	2	1
14	519	2	16.4824	3	9	2.67219	18.7054	2.0428	14.28	81.9672	0	1	1	1	1	1	1	0	1	1	0	1	1	1	1	1	1	1	1	1	1	0	2	1	1	1	1	1	0	0	0	0	1	1	0	0	1	1	1
14	408	2	13.6989	5	9	2.6681	18.6767	2.3	7	81.7076	1	1	0	1	1	1	0	0	0	1	1	1	1	0	1	0	1	0	1	1	1	1	1	0	0	1	1	0	1	1	0	1	0	1	1	0	0	0	0
8	194	1	13.5241	2	3	2.65588	18.5912	3.3	11	85.8814	0	1	0	1	1	1	0	0	1	0	1	1	0	1	0	1	1	0	0	0	0	0	1	1	2	1	1	0	0	0	0	1	1	1	0	0	0	0	0
10	392	2	14.9981	4	5	2.64713	18.5299	2.3	11	77.9909	1	1	1	0	1	1	1	1	1	0	1	1	1	1	0	0	1	0	0	1	0	1	1	2	1	0	1	0	2	1	1	1	0	0	1	0	0	0	0
8	347	2	20.1543	7	3	2.64551	18.5185	2.57724	14	58.5475	1	1	1	1	2	0	1	1	2	1	2	1	1	2	0	1	1	1	1	1	1	1	1	1	2	2	2	1	1	2	2	1	2	2	1	1	1	0	1
8	434	2	19.9314	6	3	2.64426	18.5098	2.3	9	83.8583	1	1	2	1	1	1	1	2	1	0	1	1	1	2	1	0	2	1	1	1	1	2	1	2	2	1	1	2	1	1	2	2	1	1	2	1	1	1	1
13	49	2	11.2656	1	8	2.64347	18.5043	3	7	89.3777	0	0	0	0	1	0	1	1	0	1	0	0	1	0	0	0	1	1	0	0	1	0	0	0	1	1	0	0	0	1	0	0	1	0	0	1	0	0	0
14	403	2	22.3648	7	9	2.63479	18.4436	2.3	12	68.898	1	0	1	1	1	1	2	1	2	1	1	2	1	2	1	2	1	2	2	2	2	1	2	1	2	0	2	2	2	0	1	1	2	1	2	1	2	2	1
9	99	2	18.5798	6	4	2.63166	18.4216	3	6	81	0	0	1	1	1	2	1	2	1	1	1	0	1	1	1	2	1	0	2	1	0	1	1	1	1	1	1	1	1	2	1	0	1	2	1	0	1	1	1
10	119	2	16.3315	4	5	2.62467	18.3727	3	14	77.2025	2	0	0	0	0	0	1	0	0	2	0	1	1	1	0	1	2	1	0	1	1	2	0	2	1	1	1	0	1	1	1	0	1	1	1	1	1	1	1
8	510	1	15.2543	4	3	2.62183	18.3528	2.3	15	70.5647	0	1	0	1	0	1	1	0	1	1	1	0	1	1	0	1	0	1	1	1	0	1	1	0	1	1	0	0	1	0	1	1	0	1	1	1	1	1	0
13	27	1	18.6057	5	8	2.61744	18.3221	3	17	79.5295	1	2	1	1	1	1	1	1	1	2	1	2	1	1	1	1	1	1	1	1	2	1	1	1	2	2	1	1	2	1	1	2	1	0	1	1	1	2	1
10	429	1	20.5192	7	5	2.61564	18.3095	2.3	13	81	1	1	1	1	1	1	2	2	2	0	2	2	1	0	1	1	1	2	2	1	1	1	2	2	1	1	1	1	1	1	1	1	2	0	2	1	2	2	2
10	12	2	16.7076	2	5	2.60202	18.2141	3	15	77	1	0	0	1	1	0	1	1	1	2	0	0	0	0	2	1	2	1	0	0	1	1	1	0	1	1	1	1	0	1	1	0	0	1	1	0	1	0	1
9	328	1	20.4959	5	4	2.59314	18.152	3	10	75.2938	2	2	1	1	1	1	2	1	1	2	1	0	1	2	1	1	2	1	0	2	2	1	0	2	1	2	2	0	1	1	2	3	1	0	1	1	2	1	1
9	47	1	18.7574	5	4	2.58849	18.1195	3	9	72.935	2	1	1	1	1	1	1	1	1	1	1	1	1	1	1	2	0	1	1	1	0	1	1	1	1	1	1	2	1	1	3	1	2	1	2	0	0	1	1
10	311	2	19.5378	4	5	2.58677	18.1074	3	7	86.2821	1	1	2	2	0	2	2	1	1	1	1	1	1	1	1	1	1	1	0	1	1	1	2	1	1	1	1	1	1	1	1	1	1	1	1	1	1	1	1
11	76	1	16.6727	5	6	2.57333	18.0133	3	15	98	1	1	1	1	2	1	0	0	1	1	1	1	1	1	1	0	0	1	1	1	0	1	1	0	1	0	1	1	2	1	1	1	1	1	1	1	1	1	1
9	452	1	16.876	2	4	2.56995	17.9896	2.3	14	88.1683	1	1	1	1	1	1	1	1	1	1	0	1	1	1	1	1	1	1	1	0	1	0	1	1	0	1	0	0	1	1	1	1	2	1	0	1	1	1	0
14	96	1	17.3862	4	9	2.56944	17.9861	3	8	96	1	1	1	0	1	1	1	1	1	1	1	0	0	1	1	1	1	1	1	1	1	1	1	1	1	1	1	1	1	0	1	1	2	1	1	0	2	1	1
14	281	2	17.5928	5	9	2.5677	17.9739	3	8	85.5912	1	0	2	1	1	2	2	0	0	2	1	1	1	1	1	1	1	1	2	1	1	0	2	1	1	1	1	1	0	1	2	1	0	1	1	1	1	1	1
10	455	1	16.5844	4	5	2.5582	17.9074	2.3	12	97	1	0	1	1	1	0	1	1	1	1	1	1	1	1	1	1	1	1	1	1	1	1	1	1	1	1	0	0	1	2	0	1	1	0	0	1	1	1	2
12	10	1	13.7401	3	7	2.55744	17.9021	3	17	82	1	1	1	1	0	0	0	1	0	0	0	1	1	1	1	1	0	0	1	0	0	0	1	1	2	1	1	1	0	0	1	1	0	1	0	1	0	0	1
11	40	2	15.9931	3	6	2.5485	17.8395	3	15	85.4433	0	0	0	1	0	0	1	0	1	1	1	2	0	1	1	2	1	1	1	1	0	0	2	0	1	1	1	0	1	1	0	1	1	2	0	1	1	1	0
12	37	1	15.3874	4	7	2.54065	17.7845	3	16	77.1743	1	1	1	1	1	1	1	1	1	1	2	0	1	0	0	1	1	1	0	1	1	0	1	1	1	1	1	0	0	0	1	0	1	1	1	1	0	1	1
13	280	1	18.3988	5	8	2.52903	17.7032	3	6	96	1	1	2	2	1	0	1	1	2	1	1	0	1	0	1	1	1	1	1	0	1	1	2	2	0	1	1	1	2	1	1	1	1	0	0	1	1	1	1
10	101	1	18.3296	6	5	2.52331	17.6632	3	15	77	1	1	0	0	1	1	1	2	1	1	1	1	1	1	1	1	1	1	1	0	1	2	1	1	2	1	1	1	0	1	0	0	2	1	1	1	1	1	1
12	74	2	16.9506	4	7	2.51538	17.6077	3	6	81	1	1	1	1	0	1	2	1	2	1	0	1	0	1	1	1	2	1	2	1	0	1	1	1	1	1	1	1	2	1	1	2	2	0	2	1	0	2	1
11	323	1	16.8434	4	6	2.50671	17.547	3	14	68.8526	0	1	1	1	1	1	2	2	0	1	1	0	0	2	0	1	1	0	2	1	1	0	0	1	2	0	1	1	2	1	1	1	1	0	1	0	1	1	1
9	143	1	18.8132	5	4	2.50374	17.5262	3.3	12	86.2598	1	1	0	0	1	1	1	0	1	2	1	0	1	1	1	1	1	0	1	2	0	1	1	1	1	1	1	2	1	1	2	1	1	1	1	2	1	1	1
14	200	1	15.9666	2	9	2.48034	17.3624	3.3	5	84	1	1	0	2	0	1	1	0	1	1	0	0	0	0	1	0	1	0	1	1	1	1	1	2	1	2	0	1	2	0	1	1	1	1	1	1	2	0	1
9	329	1	18.1522	5	4	2.47522	17.3266	2.99412	9	93.4876	1	2	0	1	1	1	1	1	1	1	1	2	1	2	2	1	2	1	1	1	1	0	1	1	2	1	2	0	1	2	1	1	1	0	1	1	2	0	2
9	95	1	16.1868	4	4	2.47388	17.3172	3	9	74.4054	1	1	0	1	0	0	1	1	1	0	1	1	0	1	1	0	0	1	1	1	1	1	1	1	1	1	1	1	1	1	1	1	1	0	1	1	0	1	1
13	261	1	15.8451	6	8	2.47377	17.3164	3	7	87.4123	0	1	0	0	0	0	1	0	1	0	1	2	1	1	0	1	1	2	1	1	0	1	0	1	1	1	2	1	1	0	1	1	1	2	0	1	0	1	1
14	228	1	21.4606	5	9	2.46718	17.2703	3.01962	18	60.2625	2	2	1	0	1	1	1	2	1	1	1	1	1	3	1	2	1	0	1	1	2	1	2	1	1	2	1	2	2	1	2	1	1	1	1	1	0	1	1
14	172	2	16.5153	6	9	2.46671	17.267	3.3	6	80.0023	1	1	1	2	0	1	1	0	1	0	1	1	2	2	0	2	0	1	1	1	1	1	1	1	1	1	1	2	1	2	1	2	1	1	1	0	2	0	0
9	409	2	18.0054	4	4	2.46668	17.2668	2.3	6	88.1433	1	1	1	1	0	2	2	0	1	2	1	1	0	2	1	0	2	0	1	1	2	1	1	0	1	1	1	1	0	0	1	1	1	1	1	1	1	1	1
13	384	2	16.8321	5	8	2.4634	17.2438	2.3	7	85.0815	1	1	0	1	1	2	1	1	0	1	1	1	1	0	1	2	0	1	1	1	1	1	0	1	1	0	1	1	1	1	1	0	1	1	1	2	1	2	0
11	301	2	16.5265	5	6	2.45704	17.1993	3	10	82	1	1	1	0	1	1	1	1	1	1	1	0	1	1	1	1	0	0	1	1	1	1	1	1	0	1	1	1	1	1	1	1	0	0	0	0	0	1	1
14	522	1	17.8506	6	9	2.43961	17.0773	2	14	67.3055	3	2	2	1	1	1	1	1	1	1	1	1	2	2	1	2	2	1	1	1	1	1	2	1	1	1	1	2	1	0	1	0	1	1	1	0	1	0	2
8	242	1	18.881	7	3	2.41658	16.9161	3	9	74.021	1	1	2	1	1	0	1	1	0	2	2	1	2	1	1	1	1	1	2	1	1	1	1	0	1	1	0	1	1	1	2	1	1	1	1	1	0	1	1
10	336	1	16.2968	7	5	2.40562	16.8394	2.90161	13	68.7418	1	1	1	0	1	1	1	1	0	0	2	0	2	1	0	1	1	1	1	1	1	1	1	1	0	2	1	1	1	1	1	0	1	1	1	1	1	1	1
10	478	2	18.4532	6	5	2.39523	16.7666	2.3	15	92	2	0	1	1	2	1	1	1	1	1	1	1	2	1	1	1	1	1	1	1	1	1	2	1	1	1	1	0	2	1	2	1	0	1	2	1	2	1	1
8	198	1	14.0232	3	3	2.39435	16.7605	3.3	7	84.2108	1	0	0	0	0	0	0	1	1	1	1	1	1	1	0	1	1	1	1	1	1	0	1	1	0	1	0	1	1	1	1	0	0	1	1	1	2	1	1
13	371	1	17.4172	4	8	2.39391	16.7574	2.3	20	96.195	1	2	1	1	1	1	1	0	0	1	0	1	1	2	1	1	1	0	1	1	1	1	1	2	1	0	1	1	1	1	1	1	1	1	1	1	0	1	0
8	249	1	12.4173	3	3	2.38688	16.7082	3	13	91.5919	0	0	1	1	0	0	0	1	0	0	1	0	0	1	0	0	1	1	1	0	0	0	0	0	0	0	1	0	1	0	1	0	0	0	1	0	0	0	2
11	527	1	17.1779	6	6	2.38457	16.692	1.85837	13	80.9812	0	2	0	1	1	1	2	1	1	1	2	2	0	1	0	1	1	1	1	1	1	1	1	2	0	1	2	2	0	1	1	1	2	0	2	0	2	0	0
8	470	2	12.3579	3	3	2.37438	16.6207	2.3	4	75	1	0	1	1	0	0	0	0	0	0	1	1	0	0	1	0	1	0	0	1	1	1	1	0	0	1	1	0	0	1	1	0	0	0	1	2	1	0	0
13	512	1	16.7399	4	8	2.36549	16.5584	2.3	15	93	1	0	1	1	1	0	0	1	0	0	1	1	0	1	1	1	1	1	1	0	2	1	0	1	1	1	1	1	2	1	1	1	1	1	1	1	0	0	2
14	263	1	13.1641	2	9	2.36214	16.535	3	7	81.2735	1	1	0	1	0	1	1	0	1	0	0	1	0	0	0	1	0	1	0	0	1	1	0	0	0	0	1	1	0	1	1	0	0	0	1	1	0	0	0
14	466	2	22.5324	9	9	2.36202	16.5341	2.3	8	86.9933	1	2	2	2	1	2	2	2	1	2	2	2	1	1	1	2	1	2	2	1	1	2	2	1	2	2	2	1	1	2	1	2	2	2	1	1	2	1	2
9	454	1	13.9296	3	4	2.35558	16.4891	2.3	12	75	0	0	1	0	0	0	1	1	1	1	1	0	0	0	1	1	0	0	0	1	1	1	0	0	1	0	1	0	1	1	0	0	0	1	1	1	0	1	0
8	25	1	16.724	5	3	2.34277	16.3994	3	18	99.3498	2	1	1	1	1	2	2	1	0	1	0	1	1	2	2	1	1	0	1	2	1	1	0	1	0	1	2	1	1	1	0	0	1	1	2	1	0	1	1
9	63	2	18.1847	5	4	2.33659	16.3561	3	5	95	0	1	2	1	1	1	2	1	1	1	0	1	2	2	1	1	1	2	1	1	1	1	1	1	1	1	1	1	2	1	1	1	1	1	2	0	1	1	1
10	316	2	14.4493	3	5	2.33462	16.3424	3	5	95	0	0	1	1	0	1	0	0	1	1	0	1	1	1	1	0	0	0	1	0	1	1	1	1	0	1	0	1	1	1	1	0	1	2	0	0	1	1	2
10	383	2	16.1848	5	5	2.31741	16.2218	2.3	8	93.5946	1	1	1	0	1	0	1	1	1	1	1	1	1	1	0	1	1	1	1	1	1	1	2	1	2	1	1	1	1	1	1	1	0	1	1	0	0	0	2
10	133	1	17.6316	2	5	2.30162	16.1113	3.3	12	89.263	2	1	2	1	1	0	1	0	1	1	1	1	0	1	2	1	2	1	0	2	1	1	1	0	1	1	0	1	1	1	1	2	2	1	1	0	1	2	1
9	57	1	16.5337	3	4	2.29442	16.061	3	11	97	2	1	1	1	1	2	0	1	1	1	1	1	0	1	1	0	1	1	1	1	1	0	1	2	1	1	1	0	1	0	1	1	1	1	0	1	1	0	2
10	288	2	15.526	4	5	2.28711	16.0097	3	7	95	1	0	0	1	0	1	0	0	1	1	1	1	0	1	0	0	1	1	1	1	1	1	0	0	1	2	1	0	1	1	1	1	1	0	1	1	0	1	1
11	267	1	17.012	4	6	2.28255	15.9778	3	4	95	1	1	1	1	2	1	0	0	2	1	0	1	1	1	0	1	1	1	1	1	0	2	1	0	0	1	0	1	1	3	0	1	0	1	2	1	1	1	1
11	341	1	23.952	11	6	2.27172	15.902	2.77576	9	79.6123	1	2	1	1	1	1	2	1	2	2	3	3	2	2	1	1	0	1	2	2	2	2	1	2	1	1	2	1	2	2	2	2	2	1	1	2	2	2	2
9	310	2	15.3748	5	4	2.25376	15.7763	3	8	83.3945	1	1	1	0	0	1	1	1	1	0	1	1	1	0	1	1	0	0	0	1	1	2	1	1	1	1	1	0	1	1	0	1	1	0	1	1	0	1	0
13	214	2	18.3804	5	8	2.25111	15.7578	3.17576	16	74.7327	2	1	1	1	1	1	1	1	1	0	1	0	1	2	1	1	1	2	1	1	1	1	2	0	0	1	1	0	1	1	2	1	0	1	0	2	2	2	1
14	279	1	17.6448	6	9	2.24693	15.7285	3	7	79.8899	1	1	2	0	1	1	1	2	1	1	1	1	1	1	1	1	1	0	1	2	1	1	0	1	1	2	2	1	1	1	0	2	1	1	1	1	0	1	0
10	369	2	14.077	2	5	2.244	15.708	2.3	15	75.9112	1	0	1	0	1	1	1	1	1	0	0	0	0	1	0	1	0	0	1	0	1	0	0	1	0	0	1	0	0	0	1	1	1	0	1	1	1	0	1
8	467	2	19.6807	7	3	2.22882	15.6017	2.3	7	83.2051	1	1	1	1	1	1	1	2	0	1	2	2	2	1	1	1	1	2	1	1	2	1	0	1	2	1	1	1	1	1	1	1	2	0	2	1	2	1	2
11	4	1	15.9592	4	6	2.22764	15.5935	3	14	79	0	0	1	1	2	0	1	0	1	1	0	1	1	0	0	1	1	0	1	1	1	2	1	2	2	1	0	1	1	1	1	1	1	0	1	0	1	0	0
12	257	1	14.2952	4	7	2.22433	15.5703	3	6	96	2	0	1	0	1	0	0	1	1	1	1	1	0	1	1	1	0	0	0	1	1	2	1	1	1	0	1	0	1	0	1	1	1	0	1	1	0	1	1
11	491	1	17.0111	3	6	2.22099	15.547	2.3	15	81	0	1	1	1	1	1	1	1	1	2	0	1	0	1	1	1	1	1	1	1	0	1	1	0	0	0	1	1	1	1	2	1	0	1	2	1	1	1	0
12	199	1	14.3048	3	7	2.21939	15.5357	3.3	6	74	0	0	0	1	1	1	0	1	0	1	1	1	1	1	1	1	0	1	0	1	0	0	1	0	1	1	1	0	1	0	1	0	0	1	1	0	1	1	1
12	170	1	16.064	6	7	2.21391	15.4974	3.3	8	88	1	1	2	0	2	1	0	2	0	0	1	1	1	1	0	0	1	0	2	1	1	0	0	1	1	1	2	1	1	1	1	2	0	0	0	1	0	0	1
11	55	2	18.4155	6	6	2.20915	15.4641	3	12	88.1904	1	2	1	1	1	1	1	0	1	1	1	2	2	1	1	1	1	2	1	1	1	1	1	1	2	0	1	0	1	1	1	1	1	2	2	1	0	1	0
11	15	2	18.6828	5	6	2.19954	15.3968	3	13	83.147	1	0	0	1	1	1	1	0	2	2	1	1	1	1	2	1	1	0	1	2	1	1	1	1	0	1	1	1	2	1	2	0	1	2	1	1	0	1	1
12	52	1	21.6228	4	7	2.1881	15.3167	3	15	84.4783	1	1	1	1	0	2	2	2	1	1	1	1	0	2	1	1	1	2	1	1	1	1	1	2	1	1	1	2	1	2	1	1	1	1	2	1	1	1	0
12	20	2	14.942	4	7	2.18768	15.3138	3	9	86	1	0	1	1	0	1	1	1	0	1	1	0	1	0	0	1	1	1	0	1	0	1	0	0	0	1	1	1	1	0	1	0	0	1	0	0	1	2	2
11	483	1	20.6035	4	6	2.18591	15.3013	2.3	15	68.0986	2	2	1	2	2	1	1	2	1	1	1	1	0	1	1	1	1	1	0	1	2	1	2	1	2	1	2	1	2	1	2	1	2	2	1	2	1	1	2
14	344	2	19.0009	6	9	2.17775	15.2443	2.63811	6	79.9846	1	1	1	1	1	1	1	1	2	1	1	2	1	2	2	2	1	1	2	1	2	1	1	1	1	1	1	1	1	2	1	1	0	2	1	1	1	1	1
10	416	2	17.3596	7	5	2.1583	15.1081	2.3	6	84.4031	1	2	1	1	2	1	0	0	1	1	2	1	1	1	1	0	1	1	2	0	0	1	2	1	1	0	1	0	1	0	1	0	0	0	1	1	1	1	1
11	190	1	15.4402	2	6	2.15646	15.0952	3.3	14	96.784	1	1	1	0	1	1	1	0	0	1	0	1	0	1	1	1	1	0	1	1	1	0	0	1	2	1	1	1	1	1	1	1	0	1	1	1	0	1	1
9	131	1	18.7536	6	4	2.15536	15.0875	3.3	14	74.2993	0	1	0	1	1	1	1	0	0	0	1	1	1	1	0	1	1	0	1	1	1	2	2	0	1	1	1	2	1	2	1	1	2	1	1	1	1	2	1
12	252	1	14.4666	3	7	2.15447	15.0813	3	11	88.4875	0	0	1	2	0	1	1	1	0	0	0	0	1	1	0	0	2	1	1	1	0	1	0	1	1	1	0	1	0	1	0	1	1	1	1	1	1	1	0
11	427	1	11.5836	3	6	2.14986	15.0491	2.3	15	98	0	0	0	1	0	0	1	0	0	0	1	0	1	1	0	0	1	1	0	0	1	1	1	1	1	1	0	1	0	1	0	0	0	0	0	1	0	1	1
14	424	2	13.365	2	9	2.12331	14.8632	2.3	18	71.2331	1	1	1	1	1	0	0	1	1	1	1	1	1	0	1	1	0	0	0	1	1	0	0	0	0	0	0	1	1	1	0	0	0	1	0	1	1	0	1
12	28	2	17.0302	2	7	2.11972	14.8381	3	17	85.9267	1	1	0	1	1	1	1	1	1	1	0	2	1	2	1	1	1	1	0	2	1	1	1	1	1	1	0	1	2	0	0	2	1	1	1	0	1	1	0
12	205	1	16.8303	3	7	2.11608	14.8126	3.3	15	81.4455	1	1	2	1	0	1	1	1	1	1	1	2	0	0	2	1	1	1	0	1	1	1	0	1	1	1	1	1	1	2	1	0	1	1	1	1	1	1	1
8	219	2	20.0519	5	3	2.10572	14.7401	3.12857	12	78	1	2	1	1	2	0	0	1	2	2	1	1	1	1	1	2	1	1	1	0	1	1	1	1	1	1	1	0	1	2	1	1	1	1	2	1	1	1	2
13	294	2	15.5858	4	8	2.10129	14.709	3	8	70.9635	0	1	1	2	1	0	0	1	1	0	1	1	0	2	0	0	0	1	1	1	0	1	2	0	0	2	1	0	1	1	1	2	1	1	1	0	0	0	1
10	299	2	16.5842	5	5	2.08733	14.6113	3	4	70.6827	1	2	0	0	2	0	0	2	0	2	1	2	1	1	0	1	0	1	1	0	0	1	2	1	1	0	1	0	1	1	1	1	1	2	0	1	0	1	1
8	250	1	15.3574	4	3	2.07706	14.5394	3	12	98	2	1	1	1	1	1	2	1	0	0	1	0	1	1	2	1	1	1	0	1	2	1	0	1	1	0	1	0	1	1	1	1	0	0	2	1	1	0	1
9	91	2	17.2955	4	4	2.077	14.539	3	12	84	0	1	1	1	1	2	0	1	0	1	1	2	1	0	1	1	0	1	0	1	1	1	0	1	1	1	1	1	1	0	1	1	1	1	0	1	1	1	1
12	22	1	18.039	7	7	2.07002	14.4901	3	7	86	1	0	1	0	1	2	1	0	0	1	1	1	2	1	1	0	1	0	1	1	1	2	2	1	1	1	1	0	1	0	1	1	1	1	0	1	2	1	0
13	430	2	19.4387	5	8	2.06878	14.4814	2.3	12	80	2	1	0	1	2	1	1	1	1	1	1	1	1	1	1	1	1	2	1	1	1	1	1	0	1	1	1	2	1	1	0	1	1	0	1	1	1	1	1
9	397	2	16.1279	4	4	2.05783	14.4048	2.3	6	77.6988	2	0	0	0	1	1	1	1	0	1	1	1	1	0	1	1	1	0	1	1	0	1	0	1	0	1	0	2	1	1	0	0	1	1	1	1	2	0	1
10	308	2	20.408	7	5	2.05547	14.3883	3	6	77.0571	1	1	2	0	1	3	2	1	1	1	1	1	1	1	2	1	1	2	2	2	2	2	1	1	2	1	1	1	1	1	1	1	1	2	1	1	2	0	1
9	149	2	13.255	4	4	2.048	14.336	3.3	17	90	1	0	1	0	1	0	0	0	1	0	1	1	0	1	0	1	1	1	1	1	1	1	0	0	1	1	1	1	1	2	0	1	0	0	0	0	0	1	1
12	78	1	16.0672	3	7	2.04677	14.3274	3	13	88.1366	1	2	0	1	0	1	0	1	0	1	0	0	0	1	1	2	2	2	1	1	1	1	1	0	0	1	1	0	0	2	1	0	0	1	1	0	1	1	1
11	381	2	15.3544	1	6	2.04359	14.3051	2.3	10	88.3527	1	0	2	1	1	0	1	1	1	1	0	0	0	0	0	2	1	0	0	0	1	1	0	0	1	2	0	1	1	1	1	1	2	1	0	1	0	1	1
13	295	2	13.678	1	8	2.03156	14.2209	3	7	79	0	1	1	1	1	0	1	0	1	0	0	1	0	1	1	1	0	0	1	0	0	0	0	0	1	1	0	1	1	1	1	0	0	0	1	0	1	0	0
9	472	2	15.8521	5	4	2.02332	14.1632	2.3	5	64.5505	1	0	1	0	0	2	1	1	1	1	1	1	1	1	0	0	1	2	0	0	1	2	1	0	1	1	1	2	1	1	0	2	0	1	1	0	1	1	0
14	297	2	20.4786	8	9	2.00188	14.0132	3	8	71.6712	1	1	1	1	1	1	1	1	2	1	1	0	1	1	2	2	2	1	2	2	1	2	2	1	1	1	2	1	1	0	2	0	1	1	1	1	1	2	0
10	377	2	15.7561	5	5	1.99859	13.9901	2.3	13	84.808	1	0	1	1	2	1	0	1	1	1	1	0	2	1	0	1	0	1	1	0	1	0	1	0	1	0	1	0	0	0	0	0	1	2	2	0	1	1	0
9	322	1	12.8414	3	4	1.9944	13.9608	3	15	86.9166	1	0	1	0	0	0	1	2	1	0	0	0	1	0	1	0	0	0	1	0	0	1	0	1	0	0	0	1	2	0	1	0	1	0	0	1	0	1	0
13	221	2	18.1909	6	8	1.97988	13.8592	3.12292	11	87.0099	1	1	1	2	0	1	1	0	1	0	1	1	1	1	1	1	1	2	1	1	1	2	1	1	1	1	1	2	1	1	2	1	1	1	2	2	1	1	0
8	121	1	18.9389	8	3	1.97048	13.7934	3	12	76.9619	1	1	2	2	1	2	0	3	2	1	2	1	1	2	2	1	1	0	1	1	2	2	1	1	2	0	2	0	1	1	0	2	1	1	1	1	1	1	1
14	196	1	17.4958	6	9	1.94883	13.6418	3.3	9	92	1	1	1	1	1	1	2	1	2	1	1	1	1	1	1	1	1	1	1	1	1	2	1	1	1	1	1	0	1	1	0	1	1	1	2	0	2	1	1
9	462	2	18.6915	5	4	1.94764	13.6335	2.3	5	95	2	2	1	2	2	0	0	0	1	1	1	0	1	1	1	2	1	1	1	2	1	1	1	1	1	1	1	1	0	1	1	1	0	1	2	1	1	2	2
9	496	1	16.064	4	4	1.94728	13.6309	2.3	15	82.4054	0	1	1	2	2	1	2	1	1	0	0	1	1	1	0	0	1	1	1	1	2	1	1	0	0	1	1	0	2	0	1	1	0	1	0	1	1	1	1
9	453	2	16.0523	3	4	1.92153	13.4507	2.3	13	77	0	1	2	1	0	1	0	0	0	1	2	1	1	0	1	0	0	0	0	0	1	0	1	1	0	0	0	1	0	1	0	1	0	2	1	1	1	1	0
11	248	1	16.0347	3	6	1.9037	13.3259	3	14	76.969	1	1	1	1	1	1	1	2	0	1	1	1	0	0	0	1	0	1	1	2	0	0	1	1	1	0	1	1	1	0	1	1	1	0	1	0	1	0	0
11	181	1	15.9931	3	6	1.88866	13.2206	3.3	13	93	1	0	0	0	0	0	0	1	0	0	1	1	0	0	0	0	1	0	1	0	0	0	0	0	1	0	1	0	0	0	0	1	1	0	1	1	1	0	0
8	46	1	15.9666	3	3	1.83567	12.8497	3	10	97	1	1	0	1	1	1	2	1	1	1	0	0	1	0	1	1	0	0	0	0	1	1	2	1	1	2	1	1	1	1	1	1	2	0	0	1	1	1	1
10	337	1	15.9592	7	5	1.83233	12.8263	2.89843	12	81.8243	1	1	1	1	1	1	1	1	0	2	2	1	2	1	1	0	1	1	1	2	1	1	1	1	1	2	1	2	2	1	2	2	1	2	1	2	1	1	1
14	305	2	15.9288	3	9	1.83015	12.811	3	6	85	0	1	1	0	0	0	0	1	0	1	0	1	0	0	1	0	1	1	1	1	1	1	0	0	1	0	1	1	0	0	0	1	1	1	0	1	0	0	1
10	415	1	15.9176	4	5	1.82894	12.8026	2.3	7	94	0	1	0	0	1	0	1	0	0	1	1	0	1	0	0	1	0	0	0	1	1	1	1	1	1	0	1	0	1	1	1	0	1	0	0	0	0	1	1
8	443	2	15.8521	6	3	1.82274	12.7592	2.3	12	82.8228	1	1	0	2	1	0	1	0	0	1	1	0	1	1	0	1	1	0	1	1	1	1	2	2	0	1	2	0	1	1	0	1	0	1	1	0	1	2	0
13	317	2	15.8451	5	8	1.81382	12.6967	3	21	79.4024	2	1	1	2	1	1	1	1	2	1	1	1	2	2	1	2	1	2	1	0	1	0	1	1	1	2	1	1	3	1	0	1	1	1	2	2	1	1	1
8	244	1	15.827	3	3	1.81026	12.6719	3	7	89	0	1	1	1	0	1	1	1	0	0	1	0	1	1	0	0	0	0	0	0	1	1	0	0	1	0	0	0	0	0	0	1	2	1	0	0	1	1	1
11	481	1	15.7811	6	6	1.80407	12.6285	2.3	15	84.2819	1	1	0	1	1	0	1	1	0	1	1	0	1	0	1	1	1	0	2	1	1	1	0	0	0	1	1	1	0	1	0	1	0	1	1	1	1	1	1
11	51	1	15.7561	3	6	1.80139	12.6097	3	5	88.0695	1	1	0	0	1	0	0	1	0	1	0	1	1	1	0	1	1	2	0	1	0	1	0	0	1	1	1	1	1	1	1	0	1	1	1	1	1	1	0
14	503	1	15.7293	7	9	1.7988	12.5916	2.3	15	79.5549	2	1	1	1	1	2	0	1	1	1	2	1	1	1	0	0	1	1	2	1	1	1	1	0	1	1	1	1	0	1	2	0	1	0	1	0	1	2	1
14	379	2	15.7211	5	9	1.79532	12.5672	2.3	12	83	1	1	1	0	1	1	1	1	1	1	0	2	2	1	1	1	1	1	1	1	1	1	2	0	1	1	1	1	1	2	1	1	1	1	1	2	2	2	1
8	425	1	15.6884	3	3	1.79264	12.5485	2.3	16	99	0	0	0	1	1	1	0	2	1	1	1	1	1	0	1	0	0	1	1	0	1	0	0	1	2	0	0	1	0	1	1	1	1	1	1	1	1	1	1
13	420	1	15.6864	5	8	1.78489	12.4942	2.3	5	76	0	1	1	0	1	1	1	2	1	1	1	0	1	1	1	1	2	1	1	1	1	1	1	0	1	1	1	1	2	1	1	1	1	1	0	1	0	1	1
11	34	2	15.659	5	6	1.76879	12.3815	3	12	88.0722	1	1	2	0	0	0	2	1	1	2	1	1	1	1	1	0	1	1	1	1	1	1	1	1	2	1	1	1	1	0	1	2	2	2	2	1	1	2	0
9	352	1	15.6372	6	4	1.76583	12.3608	2.5	10	89.548	1	1	1	1	1	0	2	2	1	0	1	1	1	1	2	1	1	1	1	1	1	1	2	1	1	1	2	1	2	0	0	1	1	2	2	1	1	0	1
9	498	1	15.6171	5	4	1.74399	12.2079	2.3	15	99	1	1	1	1	1	2	1	1	1	0	1	1	1	1	1	1	2	2	1	1	1	1	1	1	1	1	1	2	2	1	1	1	1	0	2	0	1	1	1
11	157	1	15.5858	4	6	1.74073	12.1851	3.3	19	93.1758	1	0	1	1	1	1	1	1	1	1	1	0	1	0	1	1	0	1	1	1	1	0	0	2	0	0	1	1	1	1	1	1	1	1	0	0	1	2	1
12	374	2	15.5556	7	7	1.73857	12.17	2.3	15	77	1	1	1	2	2	1	1	1	2	1	1	2	1	1	1	1	1	1	2	2	1	1	2	1	1	2	2	1	1	1	0	2	1	1	1	2	1	1	2
8	93	2	15.5542	6	3	1.7269	12.0883	3	11	75	1	1	1	1	1	1	2	1	1	1	1	1	2	1	1	1	1	1	1	1	1	1	0	1	1	0	1	2	1	0	0	1	1	1	1	1	1	1	1
10	11	1	15.544	3	5	1.71837	12.0286	3	17	91	1	0	1	0	0	0	0	0	0	1	0	0	1	0	0	1	0	1	1	0	0	1	0	0	1	0	0	1	0	1	1	1	0	1	0	0	0	1	0
9	309	2	15.526	7	4	1.71376	11.9963	3	7	93	1	2	1	1	0	2	2	1	1	1	2	1	1	1	2	1	1	2	2	1	0	1	1	1	1	2	1	0	2	1	2	1	1	1	2	2	2	2	1
11	42	1	15.514	7	6	1.69677	11.8774	3	13	82	1	1	1	1	1	1	1	1	1	0	1	1	2	1	1	0	1	1	1	0	1	2	0	1	0	1	1	1	1	1	2	1	1	1	1	0	0	1	0
11	517	1	15.4718	7	6	1.69135	11.8395	2.3	15	87.248	1	2	2	1	1	0	0	1	2	2	1	0	1	1	1	1	1	1	1	1	1	2	2	1	1	1	2	1	2	1	2	1	1	1	1	1	1	1	2
11	174	1	15.4592	6	6	1.69051	11.8335	3.3	19	84.5104	1	2	0	1	1	1	1	1	1	2	1	1	1	2	1	2	1	1	1	1	1	1	0	1	1	1	2	0	1	0	1	1	0	1	1	1	1	1	0
11	203	1	15.4544	6	5	1.68204	11.7743	3.3	17	99	1	1	2	1	2	0	0	0	1	1	2	1	1	1	0	0	1	1	1	0	1	1	0	1	1	2	1	1	0	2	1	2	1	1	0	1	1	1	2
14	100	1	15.4402	4	9	1.67964	11.7575	3	5	87.3663	0	1	1	0	1	0	0	1	1	0	0	0	1	1	1	0	1	1	1	2	1	0	1	1	1	0	2	0	0	1	0	0	0	1	1	0	1	1	1
13	326	2	15.3874	5	8	1.65744	11.6021	3	12	78	1	2	1	1	1	1	2	1	1	1	1	1	0	1	1	1	1	2	2	3	1	1	1	2	1	0	1	1	0	1	0	2	1	1	1	1	1	1	0
14	320	2	15.3748	8	9	1.65194	11.5636	3	16	77	1	2	1	1	2	2	1	1	1	1	2	1	2	1	0	0	1	2	2	1	1	1	1	1	2	1	1	1	1	0	1	1	2	2	2	2	1	0	2
13	368	1	15.3733	6	8	1.6438	11.5066	2.3	10	97	1	0	0	1	0	1	0	0	2	0	2	1	1	0	0	0	0	0	1	1	1	1	0	0	0	1	1	0	2	0	1	0	1	0	0	0	1	1	0
12	169	1	15.3574	3	7	1.63908	11.4735	3.3	9	96	0	0	0	0	1	0	1	0	0	1	1	1	1	1	0	0	1	1	0	1	0	0	0	0	0	0	1	0	0	0	1	1	1	1	0	0	1	0	0
8	234	2	15.3544	5	3	1.63252	11.4276	3.00397	5	88.8096	1	1	1	1	1	1	0	1	1	1	2	1	1	1	1	1	2	1	0	1	1	1	1	1	1	1	1	1	1	0	2	0	1	0	1	1	1	1	1
10	439	1	15.3083	6	5	1.63022	11.4116	2.3	15	98	2	1	1	1	1	2	1	1	1	1	1	1	2	1	0	1	2	1	1	1	1	1	0	1	1	1	1	1	1	1	1	0	0	1	1	0	1	0	2
11	520	1	15.2636	7	6	1.62892	11.4025	2	14	98	2	1	1	2	1	1	1	1	2	2	1	2	1	0	2	1	1	1	2	0	1	1	2	1	1	2	2	1	2	1	2	1	1	0	1	1	1	1	0
14	418	1	15.2543	4	9	1.6269	11.3883	2.3	4	95	0	1	0	0	1	1	1	2	0	1	2	0	0	0	2	0	1	0	0	1	0	1	1	1	1	1	1	0	2	1	1	1	0	1	2	0	1	1	1
11	330	1	15.2504	7	6	1.62653	11.3857	2.99176	8	74.7026	1	1	1	1	2	1	1	1	0	1	2	0	1	0	1	2	1	1	1	1	2	1	2	2	1	1	2	1	2	2	1	1	2	1	1	0	1	1	2
13	265	1	15.1991	4	8	1.62499	11.375	3	8	75.0256	1	2	0	2	1	1	1	0	1	2	1	2	1	1	2	1	1	2	1	2	2	0	1	2	1	1	1	2	1	1	1	2	1	1	1	2	0	1	1
12	306	2	15.1913	4	7	1.62329	11.363	3	5	92	1	1	1	1	1	0	1	1	1	1	1	1	1	1	1	1	0	1	1	2	0	0	1	2	1	2	1	0	1	2	2	0	1	1	1	2	1	1	1
8	166	1	15.1905	6	3	1.58059	11.0641	3.3	12	85.1505	1	1	1	0	1	2	1	1	1	2	2	2	2	0	2	2	2	1	0	1	1	1	2	1	1	1	1	0	1	1	1	2	1	2	1	2	0	1	1
13	193	1	15.1368	4	8	1.56529	10.957	3.3	12	85.0913	0	0	1	0	0	0	0	0	0	0	1	0	1	1	0	0	1	0	2	0	0	0	0	1	1	0	0	1	1	0	1	1	0	1	0	1	0	1	0
9	113	1	15.0383	7	4	1.55454	10.8818	3	21	85.0712	1	1	1	2	1	1	1	1	1	1	1	2	1	1	1	2	2	1	2	1	1	1	1	2	1	1	2	1	1	1	1	1	1	2	1	1	1	1	2
12	486	1	14.9981	4	6	1.55421	10.8794	2.3	15	99	1	1	0	1	2	1	1	1	1	1	1	1	1	2	0	1	1	1	1	0	1	0	1	1	1	1	1	1	1	1	1	2	1	1	1	0	1	1	0
14	414	1	14.9621	2	9	1.55169	10.8618	2.3	8	92.563	0	1	0	0	1	1	1	1	0	1	0	1	1	2	1	0	0	0	0	0	0	0	1	0	2	0	1	0	1	0	0	1	1	0	0	0	0	0	1
14	188	1	14.942	2	9	1.54624	10.8237	3.3	15	98	0	0	1	0	0	2	1	1	1	0	1	1	0	1	0	0	0	1	0	1	1	0	1	0	1	1	1	1	2	1	1	2	0	1	0	1	1	0	1
14	477	1	14.8665	0	9	1.52501	10.6751	2.3	15	99	0	0	0	1	0	0	0	0	1	0	0	0	0	1	0	0	0	0	0	0	1	0	0	0	1	0	0	1	0	0	0	1	0	0	0	0	0	0	1
11	110	2	14.8535	7	6	1.51386	10.597	3	7	84	1	1	1	2	2	1	1	1	1	2	2	2	2	1	1	1	1	1	1	2	1	1	1	1	2	1	1	2	2	1	1	1	1	1	1	1	2	1	2
9	60	2	14.6944	6	4	1.50931	10.5652	3	8	82	2	0	1	1	1	1	1	1	1	2	1	1	1	0	0	1	1	3	1	1	1	1	0	1	1	1	2	0	0	1	1	0	1	1	0	1	1	1	1
11	492	2	14.6427	7	6	1.50107	10.5075	2.3	15	94	2	0	2	1	2	1	1	2	3	1	1	0	2	2	0	0	0	2	2	1	1	1	1	2	1	2	1	2	1	1	1	1	1	1	1	1	1	1	1
13	484	2	14.5924	5	8	1.48648	10.4054	2.3	15	66.6428	1	0	1	1	0	0	3	2	1	1	1	0	1	1	1	1	1	1	1	0	1	1	1	0	1	1	1	1	1	1	1	0	1	1	1	1	0	0	0
11	431	1	14.4907	5	6	1.47798	10.3459	2.3	12	97	0	1	1	0	1	1	1	0	1	1	2	1	0	1	1	1	1	1	1	2	1	1	1	1	0	1	1	1	0	0	0	1	0	1	1	2	1	1	1
8	359	2	14.4666	7	3	1.47661	10.3363	2.33102	6	77.7957	1	0	1	1	1	1	1	1	1	2	2	1	2	1	1	2	2	1	1	1	1	1	1	1	1	1	1	1	1	2	1	1	1	2	1	1	2	2	2
12	449	1	14.4493	1	6	1.4754	10.3278	2.3	6	96.5202	1	0	0	1	1	2	0	1	1	1	0	1	0	1	1	1	2	1	1	1	0	0	1	0	1	1	0	1	1	0	1	1	0	0	1	1	1	0	1
14	400	2	14.4172	4	9	1.46984	10.2889	2.3	14	87.1317	0	0	1	0	1	1	1	1	0	1	2	0	0	1	0	1	1	1	1	0	0	1	1	1	1	1	0	1	1	1	0	1	1	2	1	1	0	0	1
11	426	2	14.3726	7	6	1.43457	10.042	2.3	15	90	1	2	1	1	1	2	0	1	1	1	1	1	1	1	2	1	2	1	1	2	1	2	0	1	1	1	2	1	2	1	2	1	1	0	1	1	2	1	1
13	390	1	15.827	3	8	1.39503	9.76518	2.3	12	98	0	1	1	0	0	1	0	1	1	0	0	1	1	0	0	0	1	1	1	1	0	1	1	0	1	1	0	1	1	1	0	0	1	0	1	0	1	1	1
8	515	1	15.7811	1	3	1.38781	9.71464	2.3	15	83.4338	0	1	1	0	0	0	0	0	1	0	1	1	0	0	0	0	0	1	0	1	0	0	1	1	0	0	0	1	1	1	1	0	1	0	1	1	0	1	1
11	433	1	15.7561	5	6	1.37262	9.60837	2.3	10	72.9801	2	1	1	1	1	1	1	1	2	1	2	1	0	1	1	1	1	1	1	2	1	1	1	2	1	1	1	1	1	1	2	1	2	1	1	1	1	1	2
8	479	1	15.7293	7	3	1.34708	9.42958	2.3	15	77.3934	1	2	1	0	2	1	1	1	2	2	2	1	2	1	1	2	1	2	1	1	2	1	2	1	1	2	1	2	1	1	1	1	1	1	2	2	2	1	1
8	370	1	15.7211	1	3	1.34471	9.413	2.3	21	100	#NULL!	0	0	0	0	0	1	1	0	0	0	1	0	2	1	1	0	0	0	0	0	0	1	0	0	1	1	1	1	1	1	1	0	0	1	0	1	0	1
14	507	2	15.6884	3	9	1.34104	9.38729	2.3	15	70.308	1	0	1	1	1	1	1	0	1	0	0	0	1	0	0	0	0	1	1	1	0	1	0	0	1	1	0	0	0	1	0	1	1	1	0	0	1	1	0
8	50	2	15.6864	6	3	1.29282	9.04975	3	6	62.9728	1	2	1	0	2	1	1	1	2	1	2	1	1	1	1	2	0	1	1	2	1	1	0	1	1	2	1	1	1	1	1	1	1	0	1	1	1	2	2
9	137	1	15.659	7	4	1.28894	9.02257	3.3	17	60.6535	1	1	1	2	1	1	1	2	0	1	1	2	1	1	2	1	2	1	2	0	1	1	1	2	0	1	2	1	1	2	1	1	1	1	1	1	1	1	1
8	313	2	15.6372	4	3	1.21807	8.5265	3	8	70.9423	1	0	0	0	1	1	1	1	2	1	1	1	1	1	0	1	2	0	1	0	1	1	0	0	0	2	0	1	1	1	1	1	0	1	1	1	0	0	2
13	246	1	15.6171	7	8	1.1937	8.35592	3	5	84	2	1	1	2	1	1	1	1	1	1	1	1	2	1	1	1	2	1	1	1	1	1	1	2	2	1	2	2	1	1	1	1	1	2	2	1	1	1	2
8	387	2	15.5858	3	3	1.19349	8.35443	2.3	15	85.8367	1	1	0	1	1	0	1	0	0	1	0	1	0	0	0	0	1	0	1	0	0	1	0	1	0	1	1	0	1	1	1	0	0	0	1	1	1	0	2
12	270	1	15.5556	3	7	1.18461	8.2923	3	9	80.9625	1	0	0	0	1	1	1	1	0	1	0	1	1	0	0	0	1	1	1	0	0	0	1	0	1	0	1	1	0	0	0	1	0	0	1	1	1	1	0
14	183	1	15.5542	3	9	1.16167	8.13167	3.3	12	82	1	1	1	1	1	0	2	1	0	1	1	1	0	1	1	1	1	1	1	1	0	1	0	0	2	1	0	1	1	1	0	1	1	0	1	1	1	2	2
11	419	2	15.544	2	6	1.15875	8.11122	2.3	4	87.4085	0	0	1	1	1	0	0	0	0	0	0	1	0	1	1	0	1	0	1	1	1	0	0	1	1	0	1	0	1	1	1	0	1	0	1	1	1	0	0
11	372	2	15.526	3	6	1.15693	8.0985	2.3	18	75	1	1	1	1	1	0	0	0	1	1	1	1	1	0	0	0	0	0	0	0	1	0	1	0	0	0	1	0	0	1	0	0	1	0	0	0	1	1	1
10	258	1	15.514	2	5	1.1519	8.0633	3	5	95	1	1	1	0	1	1	0	1	1	0	0	0	0	0	1	0	0	1	1	1	1	0	1	1	1	0	1	1	1	0	1	1	0	0	1	0	1	1	1
9	72	1	15.4718	2	4	1.13326	7.93282	3	8	86.8941	0	1	1	1	2	0	1	0	1	0	0	1	1	1	1	0	1	1	0	1	2	0	1	1	1	1	1	0	0	0	1	1	1	1	1	1	0	1	1
8	56	1	15.4592	8	3	1.12685	7.88798	3	12	85	0	2	1	1	1	1	0	0	1	1	2	1	2	0	2	0	0	0	1	1	1	1	1	0	1	1	2	1	1	1	0	1	1	1	0	1	0	0	1
11	413	1	15.4544	3	6	1.06929	7.48502	2.3	7	77	1	1	0	0	0	0	1	0	1	0	1	1	0	0	0	1	0	0	1	1	1	1	0	0	0	0	0	0	0	2	0	0	0	1	0	1	0	0	1
8	251	1	15.4402	2	3	1.05792	7.40544	3	12	98	0	0	0	1	1	0	2	0	0	0	1	0	1	1	0	0	0	0	0	0	0	0	0	0	0	0	0	0	0	0	1	0	0	0	1	1	1	0	1
10	105	1	15.3874	5	5	1.02646	7.1852	3	12	64.4722	1	1	0	1	1	0	0	2	1	1	1	2	1	2	1	1	1	1	1	1	1	1	0	1	1	0	1	1	2	1	1	1	2	0	1	0	1	0	0
14	48	2	15.3748	7	9	1.01512	7.10587	3	8	76.9887	1	1	1	1	1	1	1	1	2	0	1	2	2	0	1	1	1	1	1	1	1	2	2	1	0	1	1	0	1	1	0	1	0	1	1	2	1	1	0
14	5	2	15.3733	7	9	1.01313	7.09189	3	13	76	0	1	1	1	1	1	0	1	1	1	2	1	1	2	1	1	1	2	2	1	2	1	1	1	1	2	1	2	2	1	2	1	1	1	1	2	1	1	2
10	254	1	15.3574	6	5	1.01265	7.08854	3	9	96	1	1	2	0	0	1	1	1	1	2	1	1	2	1	1	1	0	1	1	1	0	1	0	2	2	1	1	0	0	1	1	0	1	0	0	1	0	1	1
12	506	2	15.3544	5	7	0.998373	6.98861	2.3	15	75	1	1	1	1	0	2	0	1	1	1	1	0	1	1	1	0	1	1	1	0	2	1	1	0	2	1	1	1	1	1	0	1	2	1	1	2	1	1	0
13	487	1	15.3083	4	8	0.991079	6.93755	2.3	15	89	0	0	1	0	2	1	2	1	1	1	1	1	1	1	1	1	1	1	1	1	1	1	1	1	1	1	0	0	1	1	1	0	1	2	0	1	1	1	1
11	530	2	15.2636	4	6	0.987967	6.91577	1.6557	11.62	74.5368	1	1	0	1	1	0	0	1	1	1	1	1	0	1	0	2	0	1	1	0	0	1	1	1	1	1	1	1	1	1	2	0	2	1	1	1	1	1	1
9	268	1	15.2543	4	4	0.977245	6.84072	3	5	78.0819	1	1	1	1	2	1	1	1	1	1	1	0	1	1	1	0	1	1	0	1	2	1	0	1	0	0	1	0	0	1	1	1	0	1	1	1	0	1	1
12	406	2	15.2504	6	7	0.930775	6.51542	2.3	9	80.2557	1	1	1	2	1	1	1	1	1	1	2	1	1	1	1	1	1	2	0	2	1	1	1	1	1	1	2	2	0	1	1	1	0	1	0	1	1	1	1
12	275	1	15.1991	6	7	0.923566	6.46496	3	5	95	1	0	0	1	0	0	0	1	1	0	1	1	1	1	1	0	1	1	1	0	0	2	1	1	1	2	1	1	1	1	1	1	0	0	1	1	2	1	1
8	495	2	15.1913	2	3	0.810017	5.67012	2.3	15	79.0431	1	2	1	1	0	1	0	0	1	0	0	2	0	0	1	1	1	0	1	1	1	1	1	1	1	1	0	1	1	1	2	1	1	2	2	0	0	0	1
11	273	1	15.1905	0	6	0.777084	5.43959	3	6	95	0	1	1	0	1	1	1	1	0	0	0	0	0	0	0	1	0	0	0	0	1	0	0	0	0	0	0	0	1	0	0	0	0	0	0	1	0	1	0
11	225	2	15.1368	7	6	0.73121	5.11847	3.03362	7	84.7883	1	1	2	1	1	1	2	0	1	1	1	1	1	1	1	1	1	1	2	2	1	1	2	1	1	1	2	1	1	1	1	2	2	1	1	1	2	1	1
14	94	1	15.0383	1	9	0.704538	4.93177	3	10	85.0233	1	1	0	1	1	0	1	1	1	0	0	1	0	0	1	0	0	1	0	0	0	0	1	0	1	1	1	1	0	1	0	0	1	0	1	1	1	0	1
14	2	1	14.9981	5	9	0.701592	4.91114	3	15	98	1	1	1	0	1	1	1	1	0	0	0	0	1	1	2	0	2	1	1	1	2	2	2	1	0	1	1	1	1	1	1	1	1	1	1	1	1	1	2
9	187	1	14.9621	5	4	0.694125	4.85887	3.3	16	99	2	0	0	0	0	1	1	2	0	1	1	1	2	0	0	2	1	1	1	1	1	1	1	2	1	2	0	1	1	0	1	1	1	1	2	0	2	1	1
14	376	2	14.942	1	9	0.582792	4.07954	2.3	14	85	1	1	1	0	0	0	1	0	0	1	0	1	1	0	0	1	0	1	0	0	1	0	1	1	0	0	0	0	1	0	0	0	1	0	0	1	0	0	0
14	43	1	14.8665	3	9	0.542616	3.79832	3	12	92	1	0	1	0	1	0	1	0	1	0	1	0	0	1	0	1	1	0	1	1	0	1	0	1	1	1	0	1	0	1	0	0	0	0	0	0	0	1	1
10	380	1	14.8535	1	5	0.53068	3.71476	2.3	11	97	0	0	1	0	0	0	0	1	1	0	0	0	0	0	1	1	0	1	0	0	0	0	1	1	0	0	1	0	0	0	0	0	1	1	0	1	0	1	0
8	497	2	14.6944	3	3	0.5	3.5	2.3	15	87.4495	0	0	1	0	0	1	1	1	2	1	1	2	0	1	0	1	1	2	1	1	1	1	2	2	1	1	0	1	1	2	0	1	1	1	2	2	1	1	0
11	276	1	14.5924	4	6	0.5	3.5	3	6	86	1	1	1	1	1	1	1	1	1	1	0	1	2	1	1	0	0	1	1	1	2	1	1	0	1	0	0	0	1	1	1	1	1	1	2	1	0	1	1
11	485	1	14.4666	1	6	0.5	3.5	2.3	15	87.2664	2	0	1	0	0	1	1	0	1	0	0	1	0	0	0	1	0	1	0	0	0	1	1	0	1	0	0	1	1	0	0	0	1	1	1	0	2	1	1
14	286	2	14.4907	3	9	0.5	3.5	3	9	84.9838	0	1	1	0	1	1	1	0	1	1	0	1	1	0	1	2	1	1	1	1	1	1	1	0	1	1	0	0	1	1	1	1	1	1	0	1	1	1	0
13	150	1	14.6427	3	8	0.5	3.5	3.3	16	76	1	1	0	1	1	1	1	1	1	1	0	1	1	1	1	1	1	1	0	1	1	1	1	2	1	0	1	1	0	2	1	1	2	1	2	1	1	1	1
14	394	1	14.3726	0	9	0.5	3.5	2.3	9	96	0	1	0	0	0	1	0	0	1	1	0	1	0	0	2	0	2	1	0	1	0	0	0	1	0	0	0	0	1	0	0	0	0	0	0	0	1	1	1
10	108	1	14.4172	2	5	0.5	3.5	3	9	86.387	0	1	0	1	0	1	0	0	1	0	0	1	0	0	1	0	0	0	1	0	0	1	0	0	0	1	0	1	0	1	1	0	0	1	1	1	0	0	0
13	362	2	14.4493	2	8	0.5	3.5	2.3	7	89.0479	0	1	1	0	0	0	0	1	1	0	0	0	1	0	1	1	0	0	1	0	0	0	1	0	1	1	0	0	0	0	0	0	0	0	1	0	0	0	1
[truncated: 53 more columns]
